1 Correlation between speed and turning naturally arises for  
2 sparsely sampled cell movements

3 Vitaly V. Ganusov<sup>1,2\*</sup>, Viktor S. Zenkov<sup>3</sup>, and Barun Majumder<sup>1</sup>

4 <sup>1</sup>Department of Microbiology, University of Tennessee, Knoxville, TN 37996, USA

5 <sup>2</sup>Department of Mathematics, University of Tennessee, Knoxville, TN 37996, USA

6 <sup>3</sup>Department of Electrical Engineering and Computer Science, University of Tennessee, Knoxville, TN  
7 37996, USA

8 \*Corresponding author: [vitaly.ganusov@gmail.com](mailto:vitaly.ganusov@gmail.com)

9 April 11, 2022

10

## Abstract

11 Mechanisms regulating cell movement are not fully understood. One feature of cell movement  
12 that determines how far cells displace from an initial position is persistence, the ability to perform  
13 movements in a direction similar to the previous movement direction. Persistence is thus determined  
14 by turning angles between two sequential displacements and be characterized by an average turning  
15 angle or persistence time. Recent studies found that a cell's average speed and turning are nega-  
16 tively correlated, suggesting a fundamental cell-intrinsic program whereby cells with a lower turning  
17 ability (i.e., larger persistence time) are intrinsically faster (or faster cells turn less). By simulating  
18 correlated or persistent random walks (PRWs) using two different frameworks (one based on von  
19 Mises-Fisher (vMF) distribution and another based on Ornstein-Uhlenbeck (OU) process) we show  
20 that the negative correlation between speed and turning naturally arises when cell trajectories are  
21 sub-sampled, i.e., when the frequency of sampling is lower than frequency at which cells make move-  
22 ments. This effect is strongest when the sampling frequency is on the order of magnitude with the  
23 typical cell persistence time and when cells vary in persistence time. Both conditions are observed  
24 for datasets of T cell movements in vivo that we have analyzed. In simulations the correlation arises  
25 due to randomness of cell movements resulting in highly variable persistence times for individual  
26 cells that with sub-sampling leads to large variability of average cell speeds. Interestingly, previously  
27 suggested methodology of calculating displacement of cell cohorts with different speeds resulted in  
28 similar results whether or not there is a cell-intrinsic correlation between cell speed and persistence.  
29 For both vMF- and OU-based simulations of PRWs we could find parameter values (distribution of  
30 persistence times, speeds, and sampling frequency) that matched experimentally measured correla-  
31 tions between speed and turning for two datasets of T cell movement in vivo suggesting that such  
32 simple correlations are not fully informative on the intrinsic link between speed and persistence. Our  
33 results thus suggest that sub-sampling may contribute to (and perhaps fully explains) the observed  
34 correlation between speed and turning at least for some cell trajectory data and emphasize the role  
35 of sampling frequency in inference of critical cellular parameters of cell motility such as speeds.

36 **Secondary Abstract:** Measurement of cell movements often results in a negative correlation be-  
37 tween average speed and average turning angle suggesting an existence of a universal, cell-intrinsic  
38 movement program. We show that such a negative correlation may arise if cells in the population dif-  
39 fer in their ability for persistent movement when the movement data are sub-sampled. We show that  
40 sub-sampling of cell trajectories generated using two different frameworks of persistent random walk  
41 can match the experimentally observed correlation between speed and turning for T cell movements  
42 in vivo.

43 Abbreviations: UCSP - Universal Coupling between Speed and Persistence, MSD - mean squared  
44 displacement; vMF - von Mises-Fisher, TA - turning angle, PRW - persistent random walk, OU -  
45 Ornstein-Uhlenbeck, LNs - lymph nodes.

## 46 Introduction

47 Motility is a fundamental property of cells. Motility is exhibited by single cell organisms such as  
48 bacteria or ameba as well as by cells of multicellular organisms such as cells during development or  
49 cancer [1–4]. To protect the host against pathogens, T lymphocytes, cells of the adaptive immune  
50 system, need to constantly move and survey tissues for infection [5, 6]. While molecular mechanisms  
51 of T cell motility have been relatively well defined, specific strategies that T cells use to efficiently  
52 locate the pathogen remain controversial. Some studies indicated that T cells search for the infection  
53 in the lymph nodes randomly [7, 8] while others suggested an important role of attracting cues such  
54 as chemokines [6, 9]. In non-lymphoid tissues, a wider range of movement types of T cells have been  
55 observed, including Brownian walks in the skin [10], correlated random walks in the liver [11] or in  
56 explanted lungs [12], or generalized Levy walks in murine brains [13].

57 Movement of cells in tissues *in vivo* is typically recorded using intravital microscopy at a particular  
58 frame rate (e.g., a small 3D volume of the liver or a lymph node of  $500 \times 500 \times 50 \mu\text{m}$  can be scanned  
59 with a two photon microscope every 20-30 sec, [11, 14, 15]). By segmenting images with software  
60 packages (e.g., ImageJ from the NIH or Imaris from Bitplane), 3D coordinates of multiple cells over  
61 time can be obtained. Generation of 3D cell coordinates from raw imaging data is a complicated  
62 process, and in some cases  $z$ -coordinates are either ignored or collapsed into one using maximal  
63 projection, resulting only in change in  $x$  and  $y$  coordinates for individual cells over time [16–18].  
64 Cell coordinates can be then used to characterize movement pattern of the cells. Several alternative  
65 parameters are useful in this regard [17, 19]. One is the distribution of movement lengths, which  
66 when adjusted based on the imaging frequency gives the distribution of instantaneous speeds of cells  
67 from which the average speed per cell can be calculated. The distribution of movement lengths can  
68 be used to infer heterogeneity in cell migration speeds or if cells are utilizing a specific search strategy  
69 such as Levy walks [11, 13, 16, 20, 21]. It is important to note, however, that the estimated average or  
70 instantaneous speeds of cells are generally dependent on the frequency at which imaging is performed  
71 [22].

72 Another important parameter characterizing cell movement is persistence - the ability of cells  
73 to keep moving in the direction similar to the previous movement direction; such a walk type is  
74 also defined as a correlated or persistent random walk (PRW). While intuitively cell persistence is a  
75 relatively clear concept, ways to characterize how “persistent” cells in a given population are, vary.  
76 One approach is to perform linear regression analysis on the initial change in the log-transformed  
77 mean square displacement (MSD) of cells vs. log-transformed time and find the time  $T_p$  until which  
78 the slope in this initial change is larger than 1. A more rigorous approach is to fit the Fürth equation  
79 to the MSD curve and estimate persistence time as one of the equation’s parameters [16, 18, 23–25].  
80 Another way is to calculate the slope in the exponential decline of the correlation between cell’s  
81 velocity vectors over time when averaged over all cells in the population; an inverse value of the slope  
82 also gives the average persistence time [17, 18, 24, 25]. An alternative approach to characterize the  
83 ability of cells in the population to undergo a correlated random walk is to calculate turning angles  
84 - angles between consecutive movement vectors in an experimental movie [19, 22, **Figure 1**]. The  
85 distribution of turning angles along with the movement length distribution, thus, characterizes the  
86 movement pattern of cells in the population. The average turning angle  $\bar{\phi}_t$  may then inform the ability  
87 of cells in the population to persistently move: when the average turning angle is  $\bar{\phi}_t = 90^\circ = \pi/2$  (and  
88 the turning angle distribution is described by a sin function), cells are not persistent. The fraction  
89 of cell movements with turning angles higher than  $90^\circ$  also indicates the probability of cells to turn

90 away from the previous movement direction. However, as compared to the estimated persistent time  
91  $T_p$ , the average turning angle  $\bar{\phi}_t$  does not represent an intuitive parameter indicating how long cells  
92 are persistent in their movement. Yet, while calculating the average turning angle for individual  
93 cells is possible for datasets of different sizes, calculating persistence times for individual cells can be  
94 problematic for datasets of cell movement *in vivo* since such data typically contain  $< 100$  movements  
95 per cell (e.g., [11, 13]).

96 What determines the ability of cells to exhibit correlated random walks remains poorly under-  
97 stood. We recently argued that the constrained environment of the liver sinusoids is likely to force  
98 liver-localized CD8 T cells to perform correlated random walks resulting in super-diffusive displace-  
99 ment for 10-15 minutes [11]. However, the ability of cells to perform a correlated random walk could  
100 be cell-intrinsic. Indeed, authors of several recent studies accurately measured movement of cells in  
101 2D (*in vitro*) or in 3D (*in vivo*) over time and found that there is a strong positive correlation between  
102 average cell persistence, defined as the persistence time or the cosine of turning angles, and average  
103 cell speed [18, 26, 27]; this is equivalent to the negative correlation between average turning angle  
104 per cell and cell speed. Specifically, experiments by Jerison & Quake [18] were designed to monitor  
105 migration of T cells *in vivo* in zebrafish for hours given the transparency of the animal and methods  
106 to stitch different images across nearly the whole animal. Importantly, T cell tracking was performed  
107 in 2D with a single-plane illumination microscope [18]. Their analysis of the data suggested that T  
108 cells exhibited large heterogeneity in movement speeds, cohorts of cells with similar speeds showed  
109 different persistence times, and there was a strong negative correlation between average turning angle  
110 per cell and average speed [18, see also Results section], suggesting a fundamental property of cell  
111 movement: cells that turn less have intrinsically larger speeds (or that faster cells turn less) [18, 26].  
112 Importantly, the correlation between turning ability and speed, sometimes called Universal Coupling  
113 between Speed and Persistence (UCSP), was observed for different cell types, including unicellular  
114 organisms, and genetic perturbations or treatment of cells with drugs impacting cell movement  
115 ability did not eliminate the observed correlation, suggesting that indeed the relationship between  
116 persistence and speed may be fundamental to cell movement [18, 26, 28].

117 It is important to recognize that both cell persistence (evaluated, say, by average turning angle)  
118 and cell speed are estimated parameters from experimental data, and the true turning ability and true  
119 instantaneous speeds of cells are not generally known. The frequency at which individual cells make  
120 decisions to change direction of movement and movement speed is also unknown, especially given  
121 imprecise measurements of cell positions at a high frequency of imaging *in vivo*. Here we show that  
122 the experimentally observed negative correlation between average turning angle and average speed  
123 per cell naturally arises in simulations of cells undergoing correlated/persistent random walks due to  
124 coarse sampling of cell movement trajectories (**Figure 1**). Indeed, when cells undergo a correlated  
125 random walk some cells may displace far and some may stay localized due to random chance alone,  
126 and when trajectories are sub-sampled, one expects to see a negative correlation between average  
127 turning angle and average speed (**Figure 1**) because cells which remain localized tend to show lower  
128 measured speed with large turns compared to the ones which displace far. We show that when there  
129 is a variability in persistence ability between individual cells (but not a variability in speed), the  
130 negative correlation between average turning angle and average speed is observed for a large range  
131 of measured speeds. We found sets of parameters for distribution of persistence and speeds that  
132 allow to relatively well match correlations between average speed and average turning angle found  
133 in two independent experimental datasets of T cell movement *in vivo*. Importantly, none of the  
134 conventionally used parameters such as MSD for cell cohorts or the slope between average turning  
135 angle and average speed allowed us to discriminate between the two hypotheses in which there is or

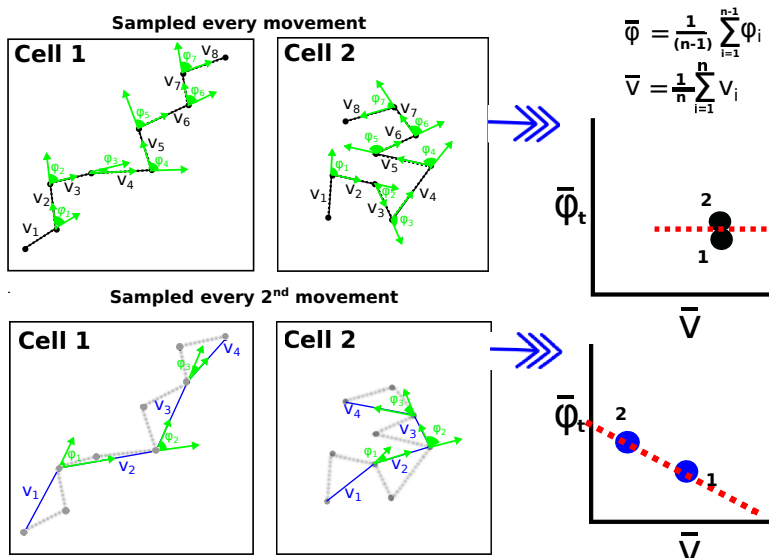

**Figure 1:** Schematic representation of how frequency of sampling of cell movement influences the observed relationship between average speed and average turning angle per cell. We plot trajectories for 2 cells and show the speed of every movement (denoted as  $v_i$ ) and turning angle ( $\phi_{t_i}$ ). When sampling is done at the same frequency as cells make a decision to turn (top panels), per model assumption average speed ( $\bar{v}$ ) and average turning angle ( $\bar{\phi}_t$ ) do not correlate. However, when sampling is done less frequently (e.g., every 2nd movement, bottom panels) the cell 2 that turned more has a lower average speed and higher average turning angle as compared to the cell 1, which turned less and had a more persistent walk. High sensitivity of the estimated average speed to the frequency at which movements are sampled is important in generating the observed correlation between speed and persistence.

136 there is not a cell-intrinsic link between persistence and speed. We also showed that the negative  
 137 correlation between average turning angle and speed strongly depends on the relative ratio of the  
 138 imaging frequency and typical cell persistence time. Our results, thus, suggest that sub-sampling of  
 139 cell movements may in some cases contribute to the observed correlation between speed and turning.

## 140 Results

141 **Correlation between persistence and speed arises naturally in simulations of PRWs with**  
 142 **sub-sampled data.** Because cells' intrinsic programs for speed and ability to turn are not known,  
 143 a cell's speed and average turning angle are estimated using measurements. Geometrically, it is clear  
 144 that if the sampling of a cell's positions occurs rarer than the times of decisions the cell makes to turn,  
 145 a negative correlation between the estimated speed and estimated turning angle may naturally arise  
 146 because cells that turned less by chance are likely to be observed to displace further, and thus have  
 147 a higher estimated speed (**Figure 1**). Likewise, the cells that remain localized will have the same  
 148 displacement but the observed speed will be low because of sampling at larger time steps. This logic  
 149 remains valid if we were to measure cell's persistence with other metrics that may be less dependent  
 150 on sampling frequency (e.g., persistence time, see below) because inferred speed is still sensitive to  
 151 sampling frequency. To check this intuition, we ran a series of stochastic simulations.

152 First, we simulated 500 cells moving randomly via Brownian motion with movement lengths  
 153 following a thin-tailed distribution (Pareto distribution with  $\alpha = 5.5$  and  $\bar{r} = 2$ , [11, see Materials  
 154 and Methods]). When the cells' positions were sampled at the frequency that the cells were changing  
 155 movement direction (i.e.,  $k = 1$ ), we observed no correlation between average speed and average

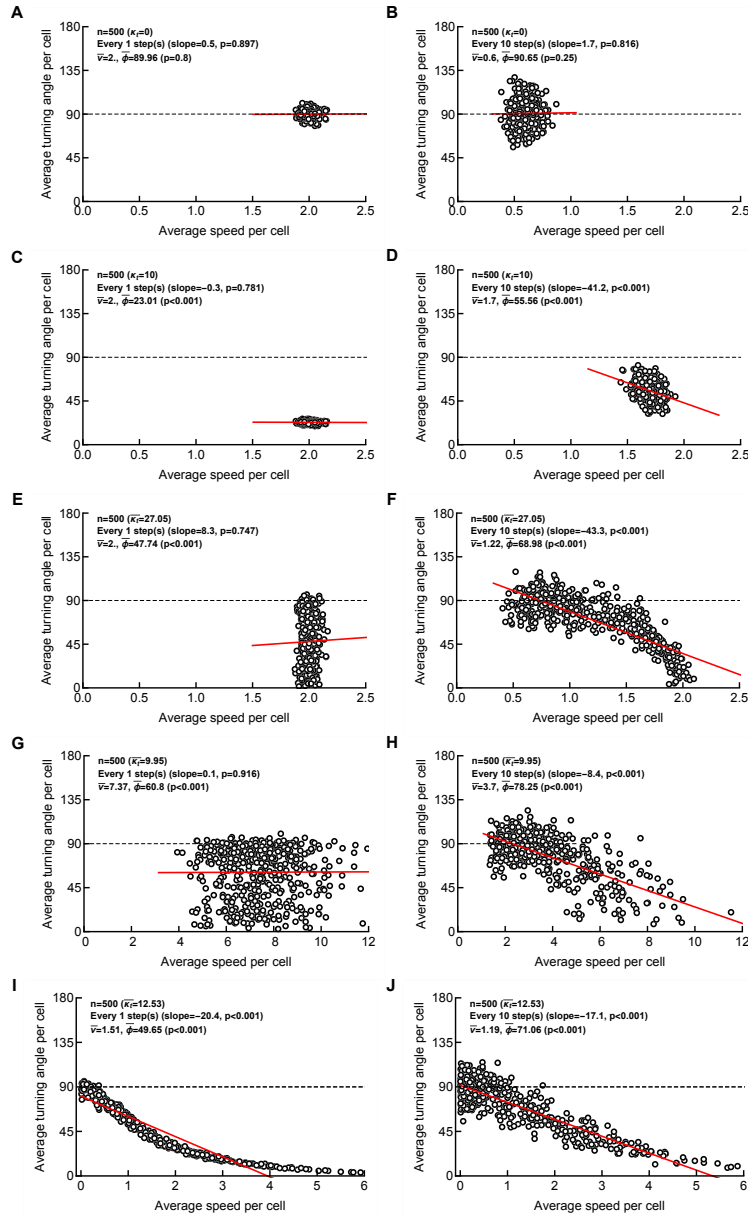

**Figure 2:** Correlation between average speed and average turning angle may arise in the absence of a cell-intrinsic link between cells’ speed and cells’ turning angles due to sub-sampling. We simulated movement of 500 cells using vMF distribution assuming i) Brownian walk ( $\kappa_t \rightarrow 0$ , A-B), ii) persistence for forward movement being identical for all cells ( $\kappa_t = 10$ , C-D), iii) heterogeneity in cells’ persistence of movement ( $\kappa_t$  was sampled from a lognormal distribution with  $\mu = 0.2$  and  $\sigma = 2$ , E-F), iv) independent heterogeneity in cells’ persistence and speed movement ( $\kappa_t$  and  $\bar{v}$  were sampled from a lognormal distribution with  $\mu = 0$  and  $\sigma = 2$  for  $\kappa_t$  and with  $\mu = 2$  and  $\sigma = 0.2$  for  $\bar{v}$ ), v) a direct relationship between cells’ persistence ability defined by  $\kappa_t$  and cells’ intrinsic movement speed ( $\bar{v} = \ln(1 + \kappa_t)$ ), with  $\kappa_t$  following a lognormal distribution with  $\mu = 1$  and  $\sigma = 2$ , I-J). The resulting trajectories were sampled either every step (A, C, E, G, I) or every  $k = 10^{\text{th}}$  step (B, D, F, H, J). Other details of simulations are given in Materials and Methods. Each panel contains information on the average speed for all cells ( $\bar{v}$ ), average turning angle for all cells ( $\bar{\phi}_t$ ), and the result of linear regression of the average speed per cell and average turning angle per cell (denoted as “slope” and shown by red line) with  $p$  value from the t-test. We also test if the average turning angle of cells in the population is different from  $90^\circ$  (Mann-Whitney test). Note different scales in A-F and G-J due to higher speeds of cells in simulations in G-J.



156 turning angle as assumed (**Figure 2A** and **Supplemental Figure S1**). As expected with sampling  
157 every  $k = 10^{\text{th}}$  movement, we still observed no correlation between average speed and turning angle  
158 (**Figure 2B**). The average speed of cells in such rarely sampled data was also about 4 times smaller  
159 than the assumed speed, because cells were turning and thus not displacing far from the initial  
160 location.

161 Second, to simulate a correlated random walk we used our newly proposed methodology of sam-  
162 pling random vectors with a bias towards a particular direction using the von Mises-Fisher (vMF)  
163 distribution [29, see Materials and Methods]. When we allowed for a moderately biased correlated  
164 random walk (with the concentration parameter  $\kappa_t = 1$  in the vMF distribution corresponding ap-  
165 proximately to the persistence time of 1 step, see below), we did not observe a statistically significant  
166 correlation between average turning angle and average speed in sub-sampled data. However, for a  
167 more biased correlated random walk ( $\kappa_t = 10$ ), we observed that rarer ( $k = 10$ ) but not regular  
168 ( $k = 1$ ) sampling of cells' positions resulted in a statistically significant but weak negative correlation  
169 between measured speed and the average turning angle per individual cell (**Figure 2C-D** and **Sup-**  
170 **plemental Figure S2**). This result arose because even with the assumed identical parameter for  
171 cell persistence  $\kappa_t$  due to randomness, some cells exhibited walks with long persistence while other  
172 cells turned (**Supplemental Figure S3**) resulting in a distribution of persistence times between  
173 individual cells. Importantly, sub-sampling of every 3 steps ( $k = 3$ ) already resulted in a statisti-  
174 cally significant correlation between speed and turning suggesting that even small sub-sampling can  
175 generate a spurious correlation (**Supplemental Figure S2C**).

176 However, it is possible that cells differ in their ability to turn, e.g., either because of cell-intrinsic  
177 program or because of environmental constraints by physical barriers or chemical cues in specific  
178 locations of the tissue [11]. Therefore, in the third set of simulations we allowed every cell to have an  
179 intrinsic turning ability (defined by individual  $\kappa_t$ ) drawn from a lognormal distribution (to allow for a  
180 broader range of  $\kappa_t$ ). Importantly, while there was no correlation between speed and turning angle for  
181 frequently measured cell movements (**Figure 2E**), when sub-sampling the trajectory data we observed  
182 a strong negative correlation between speed and turning angle for a larger span of the speeds (**Figure**  
183 **2F** and **Supplemental Figure S4**). Impressively, sub-sampling only other step ( $k = 2$ ) already  
184 resulted in statistically significant correlation between speed and turning (**Supplemental Figure**  
185 **S4C**). Similar to “simpler” simulations, cells that had a smaller  $\kappa_t$  had a higher propensity to turn,  
186 resulting in a smaller overall displacement, and thus, in smaller measured speeds. In contrast, cells  
187 that turn little (high  $\kappa_t$ ) have estimated speeds close to the set intrinsic value ( $\bar{r} = 2$ ). Interestingly,  
188 allowing for speeds to be a cell's property (i.e., when  $\bar{r}$  for individual cells was sampled from a  
189 lognormal distribution) with cells undergoing a persistent random walk ( $\kappa_t = 10$ ) did not result in  
190 a negative correlation between speed and turning angle suggesting that the relative variability in  
191 walk persistence (determined by  $\kappa_t$ ) and in speeds (determined by  $\bar{r}$ ) are important for the observed  
192 correlation in sub-sampled data (**Supplemental Figure S5**).

193 In the fourth set of simulations, we allowed both speed ( $\bar{r}$ ) and persistence ( $\kappa_t$ ) to vary between  
194 individual cells independently. Using a lognormal distribution allowed for a range of speeds and  
195 average turning angles which were independent for frequently sampled data (**Figure 2G**), but there  
196 was a strong negative correlation between average turning angle and average speed for sub-sampled  
197 trajectories (**Figure 2H** and **Supplemental Figure S6**) which resembled experimentally observed  
198 correlations (see below). Again, sub-sampling every other step ( $k = 2$ ) already resulted in negative  
199 correlation between speed and turning (**Supplemental Figure S6D**).

200 Fifth and finally, we tested how the frequency of sampling of cell movements influences the  
 201 observed correlation between cell speed and average turning angle when there is an intrinsic link  
 202 between the instantaneous speed of the cell and its turning ability. We therefore simulated cell  
 203 movement by sampling  $\kappa_t$  from a lognormal distribution and then linked cells' intrinsic speed to  
 204 cells' turning ability (by assuming  $\bar{r} = \ln(1 + \kappa_t)$  as one example). Interestingly, the frequency  
 205 of sampling had a moderate effect on the negative correlation between average speed and average  
 206 turning angle (**Figure 2I-J** and **Supplemental Figure S7**). Taken together, these results strongly  
 207 suggest that because the intrinsic cell speed, intrinsic turning ability, or frequency at which any cell  
 208 makes decisions of turning are not known, a negative correlation between measured speed of cells  
 209 and average turning angle may arise due to sub-sampling.

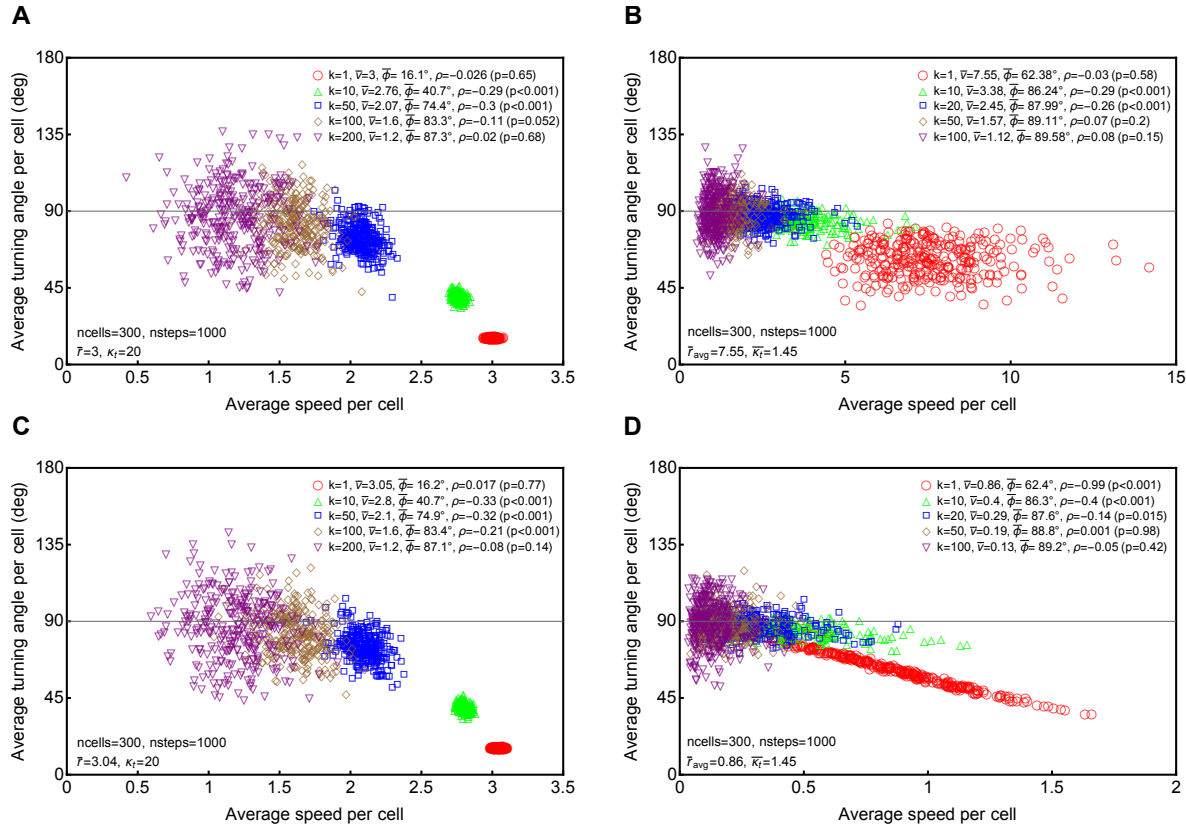

**Figure 3:** Correlation between speed and turning angle disappears for coarsely sub-sampled simulation data. We simulated 300 cells each with  $10^3$  steps using vMF distribution and sampled every  $k^{\text{th}}$  movements ( $k$  is indicated on individual panels). In panels A-B we assume that speed and concentration parameter  $\kappa_t$  are uncorrelated, and in panels C-D, speed is determined by  $\kappa_t$  via  $\bar{r} = \ln(1 + \kappa_t)$ . In panels A and C we assume that every cell have the same persistence defined by  $\kappa_t = 20$  and same speed defined by  $\bar{r} = 3$ . In panels B and D we assume that every cell in the population has a different  $\kappa_t$  which was drawn from a lognormal distribution (eqn. (4) with  $\mu = 0.2$  and  $\sigma = 0.5$ ). In panel B, every cell has a random speed determined by  $\bar{r}$  in the Pareto distribution ( $\bar{r}$  was drawn from a lognormal distribution with  $\mu = 2$  and  $\sigma = 0.2$ ), and in panel D speeds are directly determined by  $\kappa_t$  as  $\bar{r} = \ln(1 + \kappa_t)$ . Average speed  $\bar{v}$  and average turning angle  $\bar{\phi}$  for all cells are indicated on the panels, and statistical significance of the correlation between speed and turning angle per cell was determined using Spearman rank test (with the correlation coefficient  $\rho$  and p-values are shown on individual panels).

210 **Correlation between average turning angle and speed is observed only for a range of**  
 211 **sampling frequencies.** The frequency of sampling of cell trajectories relative to a typical persistence  
 212 time of cells in the population should impact the correlation between speed and turning. In particular,  
 213 if sampling is too coarse and exceeds the persistence time for all cells there should be no correlation  
 214 between average turning angle and speed. Similarly, if the sampling occurs at the frequency at



215 which cells make movements, turning and speed should not be correlated (if there is no intrinsic link  
216 between speed and persistence).

217 To check this intuition we performed a set of longer simulations of PRWs with vMF distribution.  
218 Specifically, we simulated 300 cells traversing for 1000 steps assuming that either all the cells have  
219 same ability of persistence (defined by  $\kappa_t$  of the vMF distribution) and same speed (defined by  $\bar{r}$ )  
220 or when there is a distribution of  $\kappa_t$  and  $\bar{r}$  between individual cells. Importantly, in both cases  
221 when we sample every cell movement, the correlation between average turning angle and speed is not  
222 statistically significant, while at some intermediate values of the sampling frequency  $k$  it becomes  
223 highly significant, but then disappears when sampling is too coarse (**Figure 3A-B**). Importantly, a  
224 very similar pattern is observed when speed and turning are linked, i.e., when we assume a lognormal  
225 distribution of turning abilities of the cells with speeds being directly determined by  $\kappa_t$  (**Figure**  
226 **3C-D**).

227 We performed another set of simulations where we varied the average persistence per cell (defined  
228 by  $\kappa_t$ ) but fixed the sampling frequency of the trajectories ( $k = 20$ ). Interestingly, we found a  
229 statistically significant correlation between average speed and average turning angle per cell for a  
230 broad range of  $\kappa_t$  ( $\kappa_t = 4-100$ , **Supplemental Figure S8**). This result suggests that the correlation  
231 between speed and turning is most likely to arise when the sampling frequency of cell movements is  
232 of the same order of magnitude as a typical persistence time of cells in the population ( $k \sim \kappa_t$ ).

233 **Average turning angle and persistence time are correlated metrics of cell persistence.**  
234 In addition to average turning angle, persistence time is another metric that has been used to measure  
235 ability of cells to persist. Two methods have been proposed to estimate persistence time following  
236 the Ornstein-Uhlenbeck formulation of the PRW. One is by fitting the Fürth equation to the MSD  
237 data and another is by fitting an exponential decay function to the velocity correlations [16, 30, and  
238 see Materials and Methods for more detail]. We performed simulations of 500 cell tracks, varied the  
239 concentration parameter  $\kappa_t$  of the vMF distribution, and estimated persistence times for individual  
240 cells (**Supplemental Figure S9**). We found a strong correlation between estimates found by the two  
241 methods, although the method based on the decay of velocity correlations provided lower estimates  
242 of the persistence time for larger times (**Supplemental Figure S9**).

243 In our simulations with the vMF distribution the concentration parameter  $\kappa_t$  quantifies the per-  
244 sistence ability of a cell; however, it was not clear how the magnitude of  $\kappa_t$  relates to cell's persistence  
245 time. Therefore, we simulated movement of 500 cells each with 100 steps by fixing the cell's intrinsic  
246 speed ( $\bar{r} = 2.0$ ) and  $\kappa_t$  for each cell by allowing  $\kappa_t$  to vary between different simulations. We then  
247 either sampled every cell position ( $k = 1$ ) or every 10<sup>th</sup> ( $k = 10$ ) position and estimated the average  
248 turning angle  $\bar{\phi}_t$  and average persistence time  $T_p$  for the population of cells using Fürth equation  
249 (eqn. (7)). As expected we found strong positive correlation between  $\kappa_t$  and  $T_p$ , while average turning  
250 angle was a declining function of  $\kappa_t$  (**Supplemental Figure S10A&B**). Also, these results showed  
251 a strong negative correlation between persistence time and the turning angle, suggesting that both  
252 metrics can be used to evaluate the ability of cells to persist (**Supplemental Figure S10C**). In-  
253 terestingly, sampling frequency determined by  $k$  had little influence on the estimated persistence  
254 time (**Supplemental Figure S10A**). However, when persistence is small (e.g.,  $\kappa_t \approx 1$ ), the Fürth  
255 equation did not allow to estimate the persistence time (estimated time was less than 1 step and  
256 thus unreliable), and yet, the average turning angle was significantly lower than 90°, suggesting a  
257 higher sensitivity of the latter metric to detect deviation from random turning angles. Persistence  
258 time may be difficult to estimate for individual cells when amount of data available per cell is limited.

259 For example, plots of the velocity correlations for individual cells with identical assumed persistence  
260 ( $\kappa_t = 10$ ) show large variability that translates into variable persistence time while average turning  
261 angle per cell is relatively stable (**Supplemental Figure S11**).

262 Despite these potential shortcomings of using persistence time as a metric to measure movement  
263 persistence of individual cells we investigated whether sub-sampling influences the correlation between  
264 persistence time and speed. Therefore, we performed identical simulations to those in **Figure 2E-H**  
265 and estimated persistence time of individual cells using velocity correlations. We found that that  
266 sub-sampling ( $k = 5$ ) resulted in a positive correlation between persistence time and average speed  
267 per cell (**Supplemental Figure S12B&D**) which was absent when all data were used ( $k = 1$ ,  
268 **Supplemental Figure S12A&C**). This is because while persistence time of a given cell is relatively  
269 insensitivity to sampling frequency, the average speed per cell is not, and sub-sampling results in lower  
270 speed estimates for cells with smaller persistence times. Thus, sub-sampling results in correlation  
271 between speed and persistence independently of the metric (persistence time or average turning angle)  
272 used to quantify cell persistence.

273 **Correlation between speed and turning arises in another framework to simulate**  
274 **PRWs.** All our results so far were found using a novel method of simulating PRWs using the  
275 vMF distribution [29]. To check that the correlation between average turning angle and average  
276 speed arising due to sub-sampling is model-independent (as logic suggests, e.g., **Figure 1**), we sim-  
277 ulated PRWs using an algorithm outlined by Wu *et al.* [16] that is a direct implementation of the  
278 Ornstein-Uhlenbeck model of cell movement [23–25]. We simulated 300 cells traversing 7200 steps  
279 which is equivalent to 2 hours of movement assuming that each step is 1 sec (see Materials and meth-  
280 ods for more detail). We also assumed that either cells in the population have the same persistence  
281 time of  $T_p = 0.75$  min and same speed  $s = 4.5 \mu\text{m}/\text{min}$  (**Supplemental Figure S13A**) or that  
282 both parameters vary between cells in accord with lognormal distributions (**Supplemental Figure**  
283 **S13B**). Interestingly, we found a weak negative correlation between speed and turning angle in these  
284 simulations even when we sample every cell movement ( $k = 1$  sec, **Supplemental Figure S13A**).  
285 As we sub-sample the data, the correlation between average speed and average turning angle becomes  
286 noisier (and more resembles experimental data, see below), but at higher  $k$ , when the sub-sampling  
287 becomes coarser than the typical persistence time, the correlation disappears (**Supplemental Fig-**  
288 **ure S13**). Thus, our results of simulations based on vMF distribution are confirmed with another  
289 method to simulate PRWs.

290 **Several measures such as average turning angle, speed, or MSD for cell cohorts do**  
291 **not allow to discriminate between alternative hypotheses.** In our simulations it was clear  
292 that the frequency of sampling had a major impact on the regression slope between average cell  
293 speed and average turning angle (e.g., **Supplemental Figures S2 and S4**). We therefore tested  
294 if a change in the frequency of sampling of cell movement can be used to discriminate between cell-  
295 intrinsic vs. randomly arising negative correlation between speed and turning angle. We calculated  
296 how the slopes between speed and turning angle, average speed, or average turning angle change  
297 when the frequency of imaging  $k$  changes (**Figure 4**). Unfortunately, the two models were similar  
298 in how these parameters changed with imaging frequency, except for the narrow range when imaging  
299 frequency would coincide with the frequency at which cells make turn decisions (**Figure 4A** at  $k = 1$ ).  
300 However, very frequent imaging contains many artifacts due to changes in cell shape or fluorescence  
301 signal from the cell [31] suggesting that changes in the frequency of imaging may not be the method  
302 to discriminate between these alternatives.

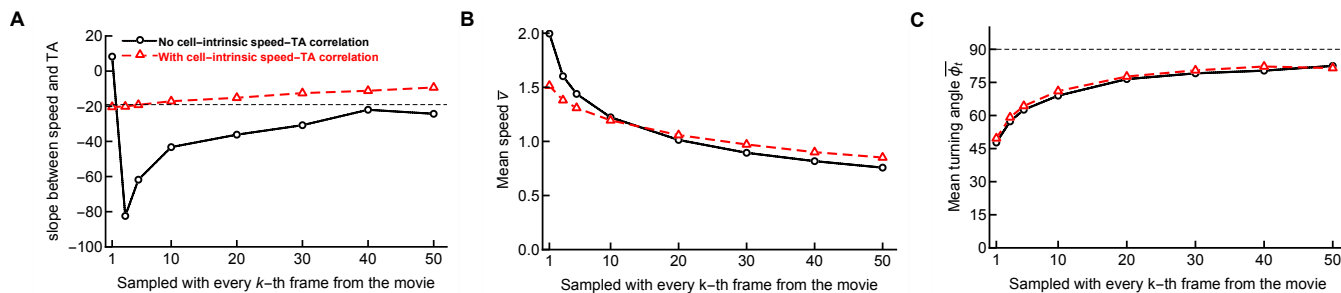

**Figure 4:** Frequency of imaging does not allow discrimination between hypotheses explaining negative correlation between measured average speed and average turning angle (TA) for a cell. We simulated movement of cells assuming that i) each cell in the population has a preference toward moving forward (defined by the concentration parameter  $\kappa_t$ ) but all cells have the same intrinsic speed (**Figure 2E-F**) or ii) for each cell is characterized by a preference to move forward defined by  $\kappa_t$  and intrinsic speed defined as  $v^{(i)} = \ln(1 + \kappa_t^{(i)})$ , where  $(i)$  indicates an  $i^{\text{th}}$  cell (**Figure 2I-J**). For different frequencies of recording cell movement, we calculated the slope between average speed and average turning angle (TA or  $\bar{\phi}_t$ ) per cell (panel A), the average speed per cell ( $\bar{v}$ , panel B), and the average turning angle per cell ( $\bar{\phi}_t$ , panel C) for the two hypotheses (without and with cell-intrinsic link between speed and turning angle, shown by different markers and lines). The thin dashed line in panel A denotes the expected slope for the model with a cell-intrinsic link between speed and turning at the lowest possible frequency of imaging ( $-90 \arctan(\pi/(2\bar{r})) / (\pi/2) \approx -19$  for  $\bar{r} = 2$ ). Values on the x-axes indicate which frames were included in the calculations. For example,  $k = 10$  indicates that data at  $t = 1, 11, 21, 31 \dots$  were used in calculations. In simulations, the concentration parameter  $\kappa_t$  was lognormally distributed between cells with  $\mu = 1$  and  $\sigma = 2$  (see **Figure 2** and Materials and Methods for more detail).

303 The MSD curves have been also used to establish the linear relationship between persistence and  
 304 speed for cohorts of cells that have similar speeds [18]. Specifically, cell cohorts with higher speeds  
 305 had a faster increase in MSD with time (higher  $\gamma$ , see eqn. (6) and other details in Materials and  
 306 methods) that was interpreted as evidence of the direct relationship between cell speed and persistence  
 307 [18]. We therefore performed additional analyses to determine if we can reject the null model in  
 308 which turning ability and speeds are cell-dependent but are uncorrelated using this methodology.  
 309 For this we simulated movements of 500 cells assuming correlated random walks using the vMF  
 310 distribution. In one set of simulations, we considered the persistence  $\kappa_t$  and the speed characterizing  
 311 parameter  $\bar{r}$ , drawn from two independent lognormal distributions (**Figure 5A-B** and **Supplemental**  
 312 **Figure S14**). As expected, the frequency of sampling impacted dramatically how different cell  
 313 cohorts displaced over time (**Supplemental Figure S14**), and while for frequent (every  $k = 1$   
 314 frame) sampling different cell cohorts were similarly super-diffusive with  $\gamma > 1$  (**Figure 5A** and  
 315 **Supplemental Figure S14A**), coarse sampling (every  $k = 10$  movements) resulted in different  
 316 cohorts displacing differently, with slowest cohorts having low ( $\gamma = 1.2$ , **Figure 5B**) or close to  
 317 Brownian diffusion ( $\gamma \approx 1$ , **Supplemental Figure S14D**).

318 In another set of simulations, we let the persistence  $\kappa_t$  be drawn from a lognormal distribution with  
 319  $\bar{r}$  being directly determined by  $\kappa_t$  through the relation  $\bar{r} = \ln(1 + \kappa_t)$ . As expected, frequent sampling  
 320 (every movement,  $k = 1$ ) resulted in cell cohorts with different speeds displaying different rates of  
 321 displacement, with slower cells displacing nearly as Brownian ( $\gamma \approx 1$ , **Figure 5C**). Importantly, for  
 322 coarsely sampled data ( $k = 10$ ), displacement of cell cohorts with different speeds did not dramatically  
 323 change (**Figure 5D**), and the curves were similar to the simulations in which speed and persistence  
 324 were not intrinsically correlated (compare **Figure 5B&D**). This further suggests that MSD plots for  
 325 cell cohorts with different speeds cannot be used to infer the intrinsic correlation between speed and  
 326 turning.

327 **Sub-sampled simulations can match experimental data.** So far our simulations did not

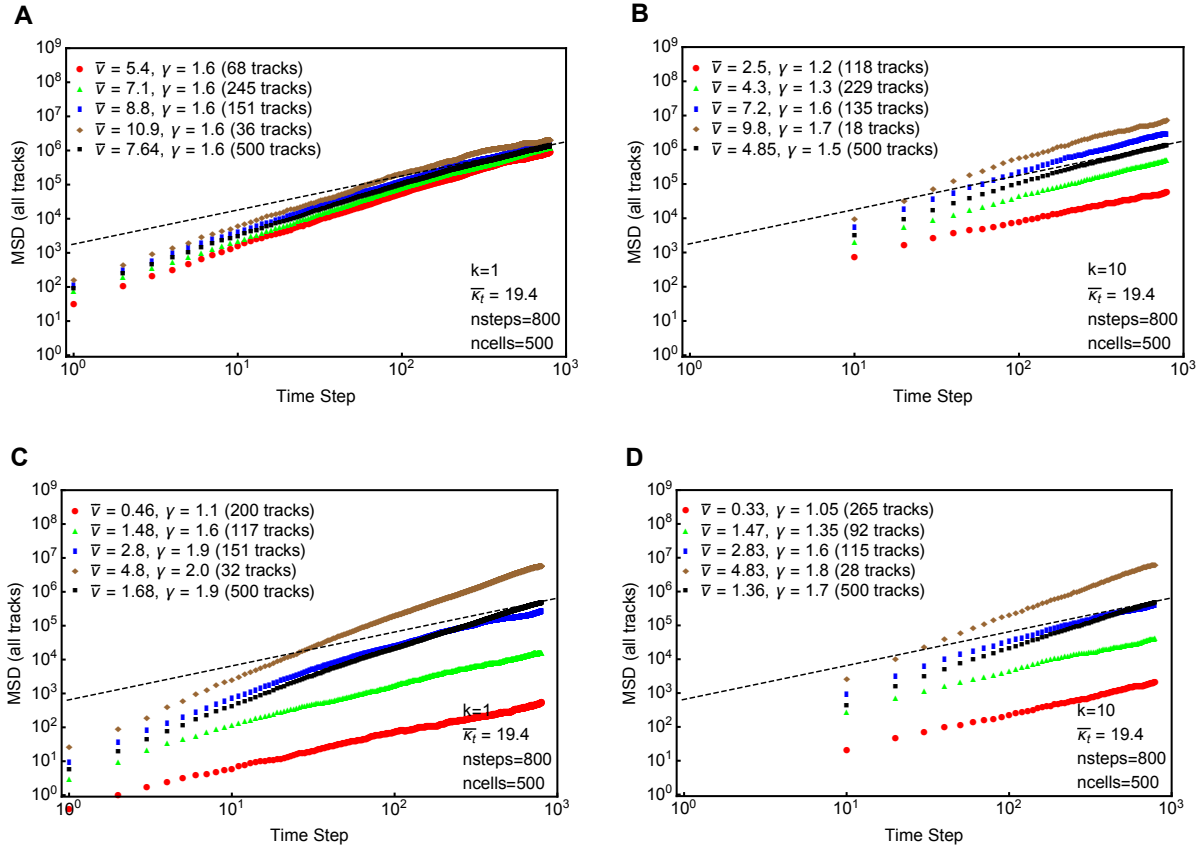

**Figure 5:** Change in mean square displacement (MSD) with time for different cell cohorts is qualitatively equivalent whether there is or there is not an intrinsic link between the average speed and average turning angle per cell under coarse sampling of the cell trajectories. We simulated movement of cells assuming a correlated random walk characterized by the concentration parameter  $\kappa_t$  of the vMF distribution (see eqn. (1)) and an independent distribution of cell speeds (characterized by the mean  $\bar{r}$  of the Pareto distribution, see eqn. (3); panels A&B) or when there is a direct correlation between  $\kappa_t$  and cell speed (panels C&D). We sampled the movement data either every step ( $k = 1$ , A&C) or even 10<sup>th</sup> step ( $k = 10$ , B&D). In all simulations, the parameter  $\kappa_t$ , which dictates the average turning angle of a cell (i.e., persistence), is randomly drawn from a log-normal distribution with mean  $\mu = 1$  and standard deviation  $\sigma = 2$  (eqn. (4)). The timestep indicates the regular intervals at which we simulated the cell positions, and MSD is dimensionless. In one set of simulations (A-B), we randomly draw  $\bar{r}$  from an independent log-normal distribution with mean  $\mu = 2$  and standard deviation  $\sigma = 0.2$ . In the Pareto distribution we set  $\alpha = 3$  for every cell we calculated  $r_{\min} = \bar{r}(\alpha - 1)/\alpha$ . In another set of simulations, we let  $\bar{r} = \ln(1 + \kappa_t)$  for every cell (C&D). Simulations were done with  $n = 500$  cells for 800 timesteps. Four speed bins were considered from the distribution of average speed per cell and for each bin MSD was computed. We also include the MSD for all tracks together. To characterize the MSD we used the relation  $\text{MSD} = ct^\gamma$  where  $\gamma = 1$  suggests Brownian diffusion (denoted by a thin black dashed line) and  $\gamma > 1$  suggests superdiffusion. The parameter  $\gamma$  was estimated for each MSD curve by linear regression of the log-log transformed MSD data.

328 allow to find a significant difference in several major characteristics of cell movement between a  
 329 model with an intrinsic link between cell persistence and speed and a model without such link. We  
 330 therefore wondered if comparing simulations to actual data may allow to see the inadequacy of the  
 331 “sub-sampling” model. Comparing the model simulations with the data was not trivial, however,  
 332 because 1) our vMF distribution-based simulations were done using dimensionless units (time step,  
 333 movement length) and experimental data have dimensions, and 2) specific elements of the data that  
 334 need to be compared with those of simulations may be debated. We opted for a simple approach  
 335 whereby we attempted to reproduce the experimentally observed correlation between average turning  
 336 angle and average speed per cell with that found in simulations. For a fair comparison we needed the  
 337 data to be sampled at regular time intervals but we found that in about 35% of tracks (out of 712)  
 338 in control experiments of Jerison & Quake [18] there were missing time step values. We therefore  
 339 cleaned the data splitting the tracks with missing values and assigning new track ID to each of the  
 340 new trajectories as we described recently [11]. This resulted in 1337 trajectories with now identically  
 341 spaced measurements (every 45 sec) with 68 movements per track on average. Importantly, 101 of  
 342 these had only 1 or 2 time steps that did not allow to calculate the average turning angle and average  
 343 speed per track, hence these were removed, resulting in 1236 tracks which were analyzed further  
 344 (**Supplemental Figure S15**). For every trajectory we calculated the average speed and average  
 345 turning angle and found a strong negative correlation between the two parameters (**Figure 6** and  
 346 **Supplemental Figure S15**).

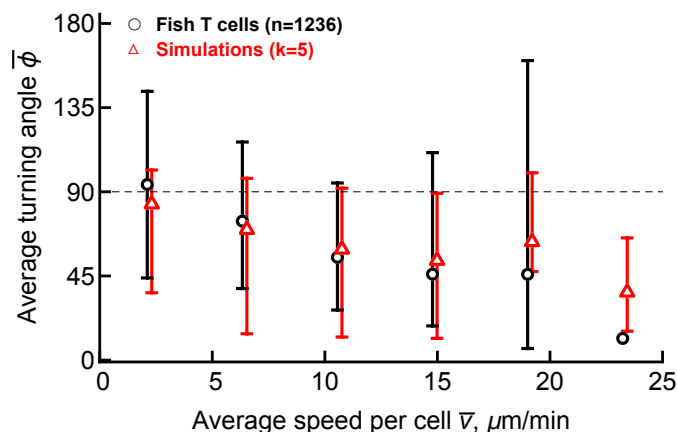

**Figure 6:** Matching simulations of cell movement in which cell’s speed and turning ability are uncorrelated with experimental data. For cleaned data of Jerison & Quake [18] we calculated the average turning angle and speed for every trajectory and plotted binned data. Note that the bin with the largest average speed had only one trajectory. We also performed simulations in which every cell has a defined persistence ability and speed, sub-sampled the resulting simulation data (every  $k = 5$ th step was used, see **Supplemental Figure S15** for more detail). To simplify calculations we assumed that this sampling frequency is 1min, calculated the average turning angle and average speed for every trajectory, and then binned these simulation data in the identical way to that of actual experimental data. Confidence intervals denote 2.5 and 97.5 percentiles of the data. Also note that while experimental data were collected in 2D by ignoring z-coordinates of the moving cells [18], our simulations were done in 3D.

347 We then performed a series of simulations with 1000 cells each undergoing 100 movements by  
 348 varying the distribution of persistence ability (determined by concentration  $\kappa_t$ ) and speed (determined  
 349 by the average movement length  $\bar{r}$ ) and sub-sampling frequency ( $k > 1$ ). Then for every track in the  
 350 simulated data we calculated the average speed and average turning angle. Because we could not find  
 351 solid methods to compare two scattered plots, we binned experimental data and data from simulations  
 352 into cell cohorts with similar average speeds (**Supplemental Figure S15**). We found that by  
 353 changing parameters of the distribution for  $\kappa_t$ ,  $\bar{r}$  and sub-sampling frequency  $k$  we could relatively  
 354 well visually match the experimental data for some parameter combinations (e.g., **Supplemental**



355 **Figure 6)** further suggesting that a model in which turning ability of T cells and their intrinsic speed  
356 are uncorrelated is consistent with experimental data for some parameter values that do not appear  
357 to be unrealistic.

358 The main issue with modeling PRWs with vMF distribution is that all the model parameters are  
359 unconstrained by the data. In contrast, Wu *et al.* [16] method of simulating PRWs may be more  
360 constrained by experimentally measured parameters such as sampling frequency and persistence time  
361 of cells. Because the data on T cell movement in zebrafish are 2D projection of 3D movements (which  
362 may generate artifacts), we analyzed another recently published dataset on 3D movement of naive  
363 CD8 T cells in murine lymph nodes [11]. For this dataset we found a strong negative correlation  
364 between average speed and average turning angle for over 1000 trajectories (**Supplemental Fig-**  
365 **ure S16A**). We could relatively well estimate the persistence time for individual cells in the data  
366 (**Supplemental Figure S16B**) with imaging frequency  $k = 20$  sec being fixed in the experiment  
367 [11, 14]. We randomly assigned every cell in the dataset a speed (**Supplemental Figure S16C**),  
368 simulated cell movement using Wu *et al.* [16] method (eqn. (5)) with the time step of 1 sec, and sub-  
369 sampled every trajectory with  $k = 20$  sec as it was done experimentally. Interestingly, for a specific  
370 distribution of speeds given a lognormal distribution we found a strong negative correlation between  
371 speed and persistence with magnitude (characterized by Spearman  $\rho$ ) being similar to that observed  
372 in the data (**Supplemental Figure S16A&D**). Visually, however, the simulated correlation was  
373 not fully matching the experimentally observed correlation with most cells in simulations exhibiting  
374 small turning angles and high speeds. This is likely because the chosen lognormal distribution of  
375 speeds may not be fully matching to what may be in the data. Our results suggest that while sub-  
376 sampling may contribute to the observed correlation between speed and turning, specific elements  
377 of that correlation, e.g., mass distribution along the correlation line, may provide ways to falsify the  
378 sub-sampling as the main driver of the correlation.

## 379 Discussion

380 Cell migration is a complicated process. In general, cells move randomly, often by correlated random  
381 walks as determined by the turning angle and movement length distributions [11]. Whether there are  
382 basic fundamental principles that determine movement strategies of cells remains debated. Recent  
383 studies with various cell types, conditions, and constraints (e.g., genetic mutations) have shown that  
384 faster cells tend to move straighter (i.e., more persistently) and slower cells tend to change direction  
385 more often, resulting in a positive correlation between persistence time and cell speed, or equivalently,  
386 in a negative correlation between average turning angle and average speed per cell [18, 26–28, 31].  
387 The generality of this correlation found for different cell types and conditions is a strong argument  
388 that correlation arises due to a fundamental, cell-intrinsic movement program that is conserved across  
389 different systems [18, 26]. Yet, there are examples of experiments in which speed and persistence  
390 are not correlated [25, 32]. For example, Stokes *et al.* [25] found migration of microvessel endothelial  
391 cells in control medium with or without agarose overlays resulted in the same persistence times but  
392 different speeds.

393 Here we argue that because turning angles and speeds are measured parameters, they are sensitive  
394 to the frequency at which the movement of cells is recorded. The assumption that cells in a given  
395 population have a broad and uncorrelated distribution of intrinsic movement speeds and turning  
396 abilities naturally results in a negative correlation between average turning angle and average speed



397 when sampling of cell trajectories is done less frequently than the cell’s “decision” for turning (**Figure**  
398 **2**); such sub-sampling must occur at the frequency that is similar to typical persistence time of cells  
399 (**Supplemental Figure S8**). Sub-sampling at frequencies that exceed persistence times of all cells  
400 will result in lost correlation between speed and turning (or speed and persistence, **Supplemental**  
401 **Figure S12**). These results are valid both in 3D and in 2D; in the latter case simulations can be  
402 done using von Mises distribution to model correlated random walks. We found the same conclusion  
403 that sub-sampling of cell trajectories results in negative correlation between speed and turning using  
404 an alternative framework to simulate correlated/persistent random walks based on OU process sug-  
405 gesting that our results are not an artifact of vMF-based simulations (**Supplemental Figure S13**).  
406 Given that in typical *in vivo* experiments sampling occurs at a frequency that of the same order of  
407 magnitude as the typical persistence time (e.g., intravital imaging of T cell movements is typically  
408 done at frequency of 1 per min and typical T cell persistence time in LNs or liver is 2-10 min, [11, 20])  
409 sub-sampling is likely to contribute to the observed correlation between speed and turning.

410 We found that simulating cell movement assuming that there is or is not a link between per-  
411 sistence and speed generated very similar movement characteristics, for example, change in MSD  
412 vs. time (**Figure 5**). Furthermore, the average turning angle or average speed were similar in two  
413 models when sampling rate was changed (**Figure 4**). Interestingly, we could relatively well match  
414 the experimentally observed correlation between average turning angle and average speed per cell  
415 using simulations for T cells in fish or in murine LNs (**Figure 6** and **Supplemental Figure S16**).  
416 However, matching the data with vMF distribution-based simulations involves several free param-  
417 eters such as the distributions of turning abilities (determined by  $\kappa_t$ ) and speeds, and sub-sampling  
418 frequency. We found that to match the data we had to assume the actual dimension value for the  
419 frequency of sub-sampling. Specifically, to produce the results in **Figure 6** we assumed that sam-  
420 pling occurs every minute (so that movement lengths calculated in simulations are then the cell speed  
421 in  $\mu\text{m}/\text{min}$ ). This implies that actual cell movements occur at every 12 sec ( $k = 5$ ), and for such  
422 movements, the average movement length is  $\bar{r} = 8.3 \mu\text{m}$ . Whether cells are able to make average  
423 movements at speeds of  $8.3\mu\text{m}/(12\text{s}) \times 60\text{s}/\text{min} = 41.5 \mu\text{m}/\text{min}$  and what is the maximal speed that  
424 T cells (or other cells) can exhibit has not been rigorously investigated. In contrast, to match the  
425 movement data of naive CD8 T cells in murine LNs using PRW model simulated with the Wu *et al.*  
426 [16] method did not require too many assumptions because sampling frequency and persistence time  
427 distribution for individual cells were taken directly from the data (**Supplemental Figure S16**).

428 While it has been typical to infer the correlation between speed and turning by calculating these  
429 average characteristics per cell, it is possible to detect changes in speed and persistence for individual  
430 cells when tracking is done over extended periods of time, e.g., for amoebas [28]. Because Jerison &  
431 Quake [18] tracked T cells in zebrafish *in vivo* for extended periods of time we investigated if speed and  
432 turning of individual T cells were correlated. For every cell movement we calculated instantaneous  
433 speed of the cell and the average turning angle for all the following movements for that cell. We found  
434 that out of 1067 trajectories containing 10 or more movements, only 17% had statistically significant  
435 correlation between speed and turning angle (after correcting for false discovery rate of 0.05), and  
436 86% of these were negative suggesting limited evidence of correlation between speed and turning for  
437 vast majority of T cells *in vivo*.

438 Our work has several limitations. The major limitation is that we could not come up with an  
439 experimental or computational way to reject the null model in which the negative correlation between  
440 average turning angle and average speed arises due to sub-sampling of trajectories of heterogeneous  
441 cells. This remains a challenge for future studies. Moreover, how sampling (sub- and over-sampling)

442 contributes to the observed patterns of cell movement remains to be investigate more rigorously, and  
443 studies that can estimate the “speed-of-light” of cells (i.e., maximal speed that cells can actually  
444 have) would be important to constrain impact of sub-sampling on inferred speeds of cells. Studies  
445 measuring kinetic details of cell migration suggested that actin, the major protein involved in cell  
446 movement, can polymerize at a rate of  $5 \mu\text{m/s} = 300 \mu\text{m/min}$  [33]. Therefore, the potential upper  
447 limit of cell’s instantaneous speed is unlikely to exceed this limit.

448 Another limitation is the relatively arbitrary choice of model parameters, such as distributions of  
449 turning angles (characterized by the concentration parameter of the vMF distribution) and distribu-  
450 tions of speeds (characterized by the Pareto distribution) and their relationship to the frequency at  
451 which movements of simulated cells are sampled. Our results suggest that the negative correlation  
452 between turning angle and speed should be observed for some parameter combinations and we found  
453 sets of parameters with which we could match experimentally observed correlation (**Supplemental**  
454 **Figure S15**). The assumed distributions did not appear unrealistic. Given the model complexity  
455 with 6 parameters (4 parameters for distributions in speed and turning, sampling frequency  $k$ , and  
456 scaling parameter to relate steps to physical units) it is likely that many different datasets can be  
457 reasonably well described by the null model but this will require that sampling frequency is at the  
458 same order of magnitude as the typical persistence time (**Supplemental Figure S8**). Because our  
459 model involves several parameters, it will require a close collaboration with an experimental group to  
460 directly determine if it is not possible to find the distribution of parameters and sampling frequency  
461 that would not match specific experimental datasets without assuming a direct link between speed  
462 and persistence.

463 Another general limitation that is not limited to our work is the estimation of persistence time  
464 of a single cell track. An average turning angle of a cell is a well-defined quantity that can be  
465 robustly estimated from the data/simulations. However, estimates of persistence time of individual  
466 cells depend on equation fits to the MSD or velocity correlation curves. For single cell tracks the  
467 velocity correlation curves can be noisy and highly variable. In particular, we simulated 500 cells  
468 with 100 tracks and computed the persistence times for each cell track by fitting an exponentially  
469 decaying function to the velocity correlation of each track (**Supplemental Figure S11**). We found a  
470 large variation in individual persistence times (see randomly chosen 10 cell tracks in **Supplemental**  
471 **Figure S11B**), however the average velocity correlation curve for all the cells gives a fairly better  
472 fit for the persistence time. This wide variation of persistence time estimates are also observed for  
473 Fürth equation fits on individual cell MSD curves.

474 Future studies may need to investigate whether cell-intrinsic correlation between speed and turn-  
475 ing impacts predictions on the efficiency of search, for example, of T cells for the infection site  
476 (e.g., [29]). One recent study suggested that some level of correlation between speed and persistence  
477 length reduces the search time of a target by 10-15% although that result was dependent on specific  
478 structural constrains of the environment [34]. Potential metabolic costs of the correlation between  
479 speed and persistence and its trade-offs with other cellular processes may need to be included in such  
480 calculations of optimality, though.

481 Previous studies measured how bacterial cells grow in size by tracking the size of individual cells  
482 over time with microscopy; by calculating the slope between the relative cell size at cell division  
483 and cell division time various models of how cells regulate the time to divide have been proposed  
484 (reviewed in [35]). Kar *et al.* [35] challenged these simple regression analyses suggesting that multiple  
485 models for cell growth may be consistent with the experimentally measured correlation between cell

486 size and division time; the authors suggested that interpretation of this correlation should be done  
487 in terms of a mathematical model of the hypothesized cell division process. Our work suggests a  
488 similar approach. For a given specific experimental system where the correlation between speed and  
489 turning is observed, authors need to develop alternative mathematical models of the cell movement  
490 programs using parameters and imaging setting close to those used in experiments and test if the  
491 observed correlation between speed and persistence may arise due to sub-sampling.

492 Movement persistence, the propensity of moving cells to keep forward movement when environ-  
493 ment and conditions are constant, can be postulated as a type of “biological inertia” (or “biological  
494 conservation of momentum”) specific to the cells [11]. Per such a postulate, changes in the environ-  
495 ment (e.g., shape of the surface on which cells move, cues, or change in nutrients) are responsible for  
496 cells changing movement, e.g., to stop and/or turn. It should be noted, however, that such “biolog-  
497 ical conservation of momentum” or “inertia” should not be confused with physical inertia, because  
498 viscous forces are much stronger than the inertial forces for biological (small) cells (the Reynolds  
499 number is of the order of  $10^{-4}$ , which classifies the cell movements under physical processes of low  
500 Reynolds numbers [36]). A more integrated experimental approach is needed to be capable of exam-  
501 ining continuous cell movements as we have observed in some experiments [15]. By using alternative  
502 mathematical models that incorporate different assumptions about cellular motility and sampling  
503 close to a specific experimental system, future collaborative studies between experimental and mod-  
504 eling groups should be able to accurately quantify the impact of sub-sampling to the commonly  
505 observed negative correlation between cell speed and turning angle.

## 506 Materials and Methods

507 **Choosing turning angles using von Mises-Fisher distribution.** To simulate cell movement  
508 in 3D, we assumed that cells undergo a correlated (persistent) random walk with the degree of  
509 persistence determined by the concentration parameter  $\kappa_t$  in the von Mises-Fisher (vMF) distribution  
510 [29, 37], which is a probability distribution on an  $n$ -dimensional sphere (in our case,  $n = 3$ ) that  
511 chooses a direction with measurable bias toward a given direction. The distribution is

$$P(\chi|\mu, \kappa_t) = \frac{\kappa_t e^{\kappa_t \mu^T \chi}}{2\pi(e^{\kappa_t} - e^{-\kappa_t})}, \quad (1)$$

where  $\mu$  is the direction vector toward which there is bias (e.g., the previous movement vector),  $\chi$  is the newly chosen direction vector,  $\kappa_t$  is the concentration (with 0 meaning no bias, positive meaning persistence, and negative meaning aversion), and  $|\mu| = |\chi| = 1$ . Random (biased) vectors given direction  $\mu$  and concentration parameter  $\kappa_t$  were generated in Mathematica (v. 12.1) by choosing a vector with bias toward direction  $\{0,0,1\}$ , which simplifies the process to choosing 1)  $x$  and  $y$  randomly from a normal distribution  $N(0, 1)$  (using function `RandomVariate`), and 2)  $z$  based on the von Mises-Fisher distribution, chosen by

$$z = 1 + (\ln(r) + \ln(1 + (1 - r) \frac{e^{-2\kappa_t}}{r})) / \kappa_t, \quad (2)$$

512 where  $r$  is chosen uniformly between 0 and 1 [38, 39]. Then  $x$  and  $y$  are weighted to place the chosen  
513 vector on the unit sphere, and then we use a rotation transform (function `RotationTransform`) to

514 adjust the generated vector with respect to the desired bias direction. The native Mathematica code  
515 to generate a random vector using the vMF distribution is

```
516 vonMisesFisherRandom[\[Mu]_?VectorQ, \[Kappa]_?NumericQ] :=  
517 Module[{\[Xi] = RandomReal[], w},  
518   w = 1 + (Log[\[Xi]] + Log[1 + (1 - \[Xi]) Exp[-2 \[Kappa]]/\[Xi]])/\[Kappa];  
519   RotationTransform[{{0, 0, 1}, Normalize[\[Mu]]}] [Append[Sqrt[1 - w^2]  
520     Normalize[RandomVariate[NormalDistribution[], 2]], w]]]
```

521 **Choosing movement length distribution.** The length of the movement  $r$  was drawn randomly  
522 from the Pareto (powerlaw) distribution

$$f(r|r_{\min}, \alpha) = \frac{\alpha r_{\min}^{\alpha}}{r^{\alpha+1}}, \quad (3)$$

523 where  $r_{\min}$  and  $\alpha$  are the scale and shape parameter, respectively, and  $\bar{r} = \alpha r_{\min}/(\alpha - 1)$ . In the  
524 Pareto distribution,  $r \geq r_{\min}$ . The Pareto distribution is useful for simulating cell movements because  
525 with one parameter,  $\alpha$ , one can have a thin- or fat-tailed distribution that corresponds to Brownian-  
526 like or Levy-like movements [21]. In simulations, we assumed  $\alpha = 5.5$ , corresponding to a thin tailed,  
527 Brownian-like distribution of movement lengths [11],  $\bar{r} = 2$ , and  $r_{\min} = \bar{r}(\alpha - 1)/\alpha$ . Specific details  
528 of the thin-tailed distribution (i.e., distribution with finite mean and variance) are not critical for  
529 simulating Brownian-like walks due to central limit theorem [21]. Thus, in our modeling framework  
530  $\kappa_t$  determines the degree of walk persistence (i.e., the average turning angle) and  $\bar{r}$  determines the  
531 speed of the cell movement. As these quantities are independent, in most of our simulations speed  
532 and turning angles truly have no correlation.

533 **Simulating PRWs using vMF distribution.** In simulations, each cell moves in a random  
534 direction (determined by  $\kappa_t$  in eqn. (1) and by the previous movement vector) and by a random  
535 distance (determined by  $r_{\min}$  and  $\alpha$  in eqn. (3)). However, if cell movements are measured at a lower  
536 frequency than the cell is moving, then the measured cell movement speed and average turning angles  
537 are calculated from the “assumed” trajectory that takes into account only some of the cell’s positions.  
538 For example, in simulating cell movement for 100 steps where we only count every  $k = 10^{th}$  step as  
539 a movement, we calculated instantaneous speeds and turning angles by taking positions 1, 11, . . . 91  
540 and then calculating the average speed  $\bar{v}$  and average turning angle  $\bar{\phi}_t$  per cell using these positions  
541 by dividing the distance travelled by the cell at these time points by  $k$ . This approach allows to  
542 properly compare mean speeds for different sub-sampling rates  $k$ .

543 In some simulations, we assumed that every cell has an inherent concentration parameter  $\kappa_t$  which  
544 determines cells’ persistence ability. We sampled values of  $\kappa_t$  from a lognormal distribution defined  
545 as

$$p(\kappa_t|\mu, \sigma) = \frac{1}{\sqrt{2\pi\kappa_t}\sigma} e^{-\frac{(\ln(\kappa_t)-\mu)^2}{2\sigma^2}}, \quad (4)$$

546 with typically chosen  $\mu = 1$  and  $\sigma = 2$  to allow for a broad distribution of persistence ability for  
547 individual cells (but see Main text for other examples).

548 We also simulated cell movement with the intrinsic cell movement speed (determined by  $\bar{r}$ ) and  
 549 persistence in the walk (determined by  $\kappa_t$ ) being correlated. We sampled  $\kappa_t$  for each cell from a  
 550 lognormal distribution (eqn. (4)) with parameters  $\mu = 1$  and  $\sigma = 2$  and let the average movement  
 551 length for each cell be  $\bar{r} = \ln(1 + \kappa_t)$ . Then, setting  $\alpha = 5.5$ , we let for every cell  $r_{\min} = \bar{r}(\alpha - 1)/\alpha$   
 552 in eqn. (3). Movement length distribution was then sampled randomly from Pareto distribution with  
 553  $r_{\min}$  and  $\alpha$  using `RandomVariate` function in Mathematica.

554 When simulating a distribution of cell-intrinsic speeds we assumed that for each cell,  $\bar{r}$  in the  
 555 Pareto distribution follows a lognormal distribution as for  $\kappa_t$  (eqn. (4)) with  $\mu = 1$  and  $\sigma = 2$  (and  
 556  $\alpha = 5.5$ ). Results were typically independent of these specific parameter values; the only major  
 557 requirement was that there is sufficient variability in  $\kappa_t$  (or  $\kappa_t$  and  $\bar{r}$ ) between individual cells.

558 **Simulating PRWs as OU process.** To simulate cell movements in 3D within the framework  
 559 of OU process we followed the supporting information of Wu *et al.* [16] and Eq. (1) of Jerison &  
 560 Quake [18]. Movement coordinates of cells at time  $t + dt$  are given by the following equations [16]:

$$\vec{X}(t + dt) = \vec{X}(t) + \left(1 - \frac{dt}{T_p}\right) \vec{dX}(t - dt, t) + \sqrt{(s^2 dt^3)/T_p} \vec{W}, \quad (5)$$

561 where  $T_p$  and  $s$  are the persistence time and speed, respectively, the position  $\vec{X}$  at  $t + dt$  depends  
 562 on the position at  $t$  guided by the persistence factor  $(1 - dt/T_p)$  with a randomness in movement  
 563 given by the Gaussian noise  $|\vec{W}|$  multiplied with a unit magnitude vector, and  $\vec{dX}$  is a displacement  
 564 vector between times  $t - dt$  and  $t$ . Given two vectors for subsequent movements, we simulated the  
 565 next movement vector using a following user-defined function in Mathematica:

```
566 OneMovement[{x1_, x2_}] := {x2, x2 + (1 - dt/pt)*s*Normalize[(x2 - x1)] +
567   Sqrt[(s^2*dt^3)/pt]*{RandomVariate[NormalDistribution[0.0,1]],
568   RandomVariate[NormalDistribution[0.0,1]],
569   RandomVariate[NormalDistribution[0.0,1]]}}
```

570 where  $\mathbf{x1}$  and  $\mathbf{x2}$  are two sequential positions, the displacement with respect to last position is given  
 571 by the term  $(1 - dt/pt)$ ,  $\mathbf{s}$  is the initial step length to start the simulation, however this  $\mathbf{s}$  is essentially  
 572 the speed in  $\mu\text{m}/\text{min}$  for sampling every step at  $k = 1$  sec. Once we have the next movement vector  
 573 we repeat this for `nsteps` and for `ncells` where `nsteps` is the multiple of `dt=1sec` in our simulations.

574 **Mean squared displacement.** To calculate the mean square displacement (MSD), we used the  
 575 relation

$$\text{MSD}(t) = \frac{1}{N} \sum_{i=1}^N |\vec{r}_i(t) - \vec{r}_i(0)|^2, \quad (6)$$

576 where  $\vec{r}_i(t)$  is the position vector of the cell  $i$  at time  $t$  and  $\vec{r}_i(0)$  is the initial position and  $N$  represents  
 577 the total number of cell tracks considered (typically in our simulations  $N = 500$ ). For different cell  
 578 cohorts, we divided the total cell tracks into speed groups based on the average speed distribution  
 579 of the individual cell tracks. To characterize the MSD plots we fitted a relation  $\text{MSD}(t) \propto t^\gamma$  using



580 least squares to estimate  $\gamma$  for all cells or cohorts of cells with similar movement speeds. Specifically,  
581 we log-transformed MSD and time, fitted a line to the transformed data, and estimated the slope  $\gamma$ .  
582 Note that  $\gamma = 1$  represents normal (Brownian) diffusion and  $\gamma > 1$  represents super-diffusion.

583 **Persistence time estimation.** We have used two different methods for the estimation of per-  
584 sistence time. In the first method we use the Fürth equation

$$\langle \vec{d}(t)^2 \rangle = 2nD[t - T_p(1 - e^{-t/T_p})], \quad (7)$$

585 where  $D$  is the diffusion coefficient of the Ornstein-Uhlenbeck process,  $n$  is the dimension of the space  
586 in which the process is studied and  $T_p$  is the persistence time [16, 25]. To avoid potential biases with  
587 data selection we fitted eqn. (7) using least squares to all data for the MSD curves.

588 Second, we also estimated the persistence time by fitting an exponentially decaying function of  
589 the form

$$V(t + \tau) = V(t)e^{-\tau/T_p} \quad (8)$$

590 to the velocity correlation curve [24, 25, 30, 40]. Specifically, we calculated the  $\cos \phi$  between vectors  
591 determining the first movement and every another movement at time step difference  $\tau$  for all cell  
592 tracks. We then computed the average  $\cos \phi$  at all time steps and plotted them with respect to the  
593 time steps. To avoid bias with data selection we fitted eqn. (8) using least squares to all data.

594 **Persistence time for population average data vs. individual tracks.** By the original  
595 definition, MSD curves are generated by averaging displacements over cells in the population. How-  
596 ever, when enough data is available for individual cells – which is not typical in our experience with  
597 *in vivo* imaging data – MSD can be calculated for individual cells [40]. In this approach, squared  
598 displacements from the initial position are calculated assuming that “initial” position shifts in time,  
599 then the squared displacements can be averaged; however, in this approach average squared displace-  
600 ments at longer time delays are not reliably estimated due to reduced number of data generated.  
601 Fürth equation (eqn. (7)) can then be fitted to such data and persistence time for individual cells can  
602 be calculated. Velocity correlation curves can be averaged for individual cells in a similar fashion,  
603 and persistence time using eqn. (8) can be estimated for individual cells. Note, however, that this  
604 approach generates noisy data especially after few time steps that reduces reliability of estimating  
605 persistence time for individual cells.

606 **Parameter dimensions and relating simulations to data.** It should be noted that in our  
607 simulations with vMF distribution we did not choose dimensions of the parameters, so the time units  
608 are in steps (1, 2, 3, etc) and movement length units are also dimensionless. This was done to prevent  
609 a bias towards particular numerical values which may differ between different biological systems.  
610 Therefore, estimated quantities such as average speed per cell has a dimension of displacement unit  
611 per time unit. To link simulation results to experimental data we assumed that when we sub-sample  
612 the data at rate  $k$  (i.e., when  $k = 10$  every 10<sup>th</sup> movement is only used), the calculated average speed  
613 per cell is then given in  $\mu\text{m}/\text{min}$  units. This effectively assumes that if we sample movements every  
614  $dt = 1$  min, so the actual movements by cells occur at a rate  $dt/k$ .

615 **Statistical analyses.** For the correlation between speed and turning (or speed and cell persis-



616 tence) we performed both Pearson (denoted by  $r$ ) and Spearman rank (denoted by  $\rho$ ) correlation  
617 analyses, and in all cases, results were statistically identical. In some cases, the Pearson correlation  
618 analysis may not be appropriate due to data not being normally distributed but we used the same  
619 test within one set of analyses for consistency.

## 620 Data sources

621 Data presented in **Supplemental Figure S15** were provided by Jerison & Quake [18] and are  
622 available via a link to github in the original publication. Data presented in **Supplemental Figure**  
623 **S16** are from our previous publication [11]; the link to github is provided in the original publication.

## 624 Code sources

625 All analyses have been primarily performed in Mathematica (ver 12) and codes used to generate most  
626 of figures in the paper are provided on GitHub [41]:  
627 [https://github.com/vganusov/correlated\\_random\\_walk\\_simulations](https://github.com/vganusov/correlated_random_walk_simulations).

## 628 Ethics statement

629 No animal or human experiments performed.

## 630 Author contributions

631 The question for the study arose during discussions of the cell movement data between all authors.  
632 VVG ran the simulations using vMF distribution-based methods by VSZ and discussed results with  
633 other authors. BM ran additional simulations, in particular, based on the PRW model. BM wrote  
634 the first draft of the paper. BM, VVG, and VSZ contributed to the final draft of the paper.

## 635 Acknowledgments

636 We would like to thank E. Jerison and S. Quake for the valuable discussions of our results and  
637 comments on the previous versions of the paper that was previously sent as commentary to eLife.  
638 This work was supported by the NIH grant (R01 GM118553) to VVG.

## 639 References

- 640 1. Lauffenburger, D. A., Rivero, M., Kelly, F., Ford, R. & DiRienzo, J. 1987 Bacterial chemotaxis.  
641 Cell flux model, parameter measurement, population dynamics, and genetic manipulation. *Annals*  
642 *of the New York Academy of Sciences*, **506**, 281–295. doi:10.1111/j.1749-6632.1987.tb23827.x.
- 643 2. King, J. S. & Insall, R. H. 2009 Chemotaxis: finding the way forward with Dictyostelium. *Trends*  
644 *in cell biology*, **19**, 523–530. doi:10.1016/j.tcb.2009.07.004.
- 645 3. Cheng, Y., Felix, B. & Othmer, H. G. 2020 The roles of signaling in cytoskeletal changes,  
646 random movement, direction-sensing and polarization of eukaryotic cells. *Cells*, **9**. doi:  
647 10.3390/cells9061437.
- 648 4. De la Fuente, I. M. & Lopez, J. I. 2020 Cell motility and cancer. *Cancers*, **12**. doi:  
649 10.3390/cancers12082177.
- 650 5. Gaylo, A., Schrock, D. C., Fernandes, N. R. J. & Fowell, D. J. 2016 T cell interstitial migration:  
651 Motility cues from the inflamed tissue for micro- and macro-positioning. *Frontiers in immunology*,  
652 **7**, 428. doi:10.3389/fimmu.2016.00428.
- 653 6. Krummel, M. F., Bartumeus, F. & Gerard, A. 2016 T cell migration, search strategies and  
654 mechanisms. *Nature reviews. Immunology*, **16**, 193–201.
- 655 7. Miller, M. J., Wei, S. H., Cahalan, M. D. & Parker, I. 2003 Autonomous t cell trafficking examined  
656 in vivo with intravital two-photon microscopy. *Proceedings of the National Academy of Sciences*,  
657 **100**(5), 2604–2609.
- 658 8. Textor, J., Peixoto, A., Henrickson, S. E., Sinn, M., von Andrian, U. H. & Westermann, J. 2011  
659 Defining the quantitative limits of intravital two-photon lymphocyte tracking. *Proceedings of the*  
660 *National Academy of Sciences*, **108**(30), 12 401–12 406.
- 661 9. Germain, R. N., Robey, E. A. & Cahalan, M. D. 2012 A decade of imaging cellular motility and  
662 interaction dynamics in the immune system. *Science*, **336**(6089), 1676–1681.
- 663 10. Ariotti, S., Beltman, J. B., Chodaczek, G., Hoekstra, M. E., Van Beek, A. E., Gomez-Eerland,  
664 R., Ritsma, L., Van Rheenen, J., Marée, A. F. *et al.* 2012 Tissue-resident memory CD8+ T cells  
665 continuously patrol skin epithelia to quickly recognize local antigen. *Proceedings of the National*  
666 *Academy of Sciences*, **109**(48), 19 739–19 744.
- 667 11. Rajakaruna, H., O'Connor, J. H., Cockburn, I. A. & Ganusov, V. V. 2022 Liver environment-  
668 imposed constraints diversify movement strategies of liver-localized CD8 T cells. *J Immunol*,  
669 **208**, 1292–1304. doi:10.4049/jimmunol.2100842.
- 670 12. Mrass, P., Oruganti, S. R., Fricke, G. M., Tafoya, J., Byrum, J. R., Yang, L., Hamilton, S. L.,  
671 Miller, M. J., Moses, M. E. *et al.* 2017 ROCK regulates the intermittent mode of interstitial T  
672 cell migration in inflamed lungs. *Nature communications*, **8**(1), 1–14.
- 673 13. Harris, T. H., Banigan, E. J., Christian, D. A., Konradt, C., Wojno, E. D. T., Norose, K., Wilson,  
674 E. H., John, B., Wenginger, W. *et al.* 2012 Generalized Lévy walks and the role of chemokines in  
675 migration of effector CD8+ T cells. *Nature*, **486**(7404), 545–548.

- 676 14. Novkovic, M., Onder, L., Cupovic, J., Abe, J., Bomze, D., Cremasco, V., Scandella, E., Stein,  
677 J. V., Bocharov, G. *et al.* 2016 Topological small-world organization of the fibroblastic retic-  
678 ular cell network determines lymph node functionality. *PLoS biology*, **14**, e1002515. doi:  
679 10.1371/journal.pbio.1002515.
- 680 15. McNamara, H. A., Cai, Y., Wagle, M. V., Sontani, Y., Roots, C. M., Miosge, L. A., O'Connor,  
681 J. H., Sutton, H. J., Ganusov, V. V. *et al.* 2017 Up-regulation of LFA-1 allows liver-resident  
682 memory T cells to patrol and remain in the hepatic sinusoids. *Science Immunology*, pp. 1–10.
- 683 16. Wu, P.-H., Giri, A., Sun, S. X. & Wirtz, D. 2014 Three-dimensional cell migration does not  
684 follow a random walk. *Proceedings of the National Academy of Sciences*, **111**(11), 3949–3954.  
685 doi:10.1073/pnas.1318967111.
- 686 17. Wu, P.-H., Giri, A. & Wirtz, D. 2015 Statistical analysis of cell migration in 3D us-  
687 ing the anisotropic persistent random walk model. *Nature protocols*, **10**, 517–527. doi:  
688 10.1038/nprot.2015.030.
- 689 18. Jerison, E. R. & Quake, S. R. 2020 Heterogeneous T cell motility behaviors emerge from a  
690 coupling between speed and turning in vivo. *eLife*, **9**. doi:10.7554/eLife.53933.
- 691 19. Beltman, J. B., Marée, A. F. M. & de Boer, R. J. 2009 Analysing immune cell migration. *Nat*  
692 *Rev Immunol*, **9**(11), 789–798.
- 693 20. Banigan, E. J., Harris, T. H., Christian, D. A., Hunter, C. A. & Liu, A. J. 2015 Heterogeneous  
694 CD8+ T cell migration in the lymph node in the absence of inflammation revealed by quantitative  
695 migration analysis. *PLoS Comput Biol*, **11**(2), e1004058. doi:10.1371/journal.pcbi.1004058.
- 696 21. Zaburdaev, V., Denisov, S. & Klafter, J. 2015 Lévy walks. *Rev. Mod. Phys.*, **87**, 483–530.  
697 doi:10.1103/RevModPhys.87.483.
- 698 22. Loosley, A. J., O'Brien, X. M., Reichner, J. S. & Tang, J. X. 2015 Describing directional  
699 cell migration with a characteristic directionality time. *PloS one*, **10**, e0127425. doi:  
700 10.1371/journal.pone.0127425.
- 701 23. Uhlenbeck, G. E. & Ornstein, L. S. 1930 On the theory of the Brownian motion. *Phys. Rev*, **36**,  
702 823–841. doi:10.1103/physrev.36.823.
- 703 24. Doob, J. L. 1942 The Brownian movement and stochastic equations. *Annals of Mathematics*, pp.  
704 351–369.
- 705 25. Stokes, C. L., Lauffenburger, D. A. & Williams, S. K. 1991 Migration of individual microvessel  
706 endothelial cells: stochastic model and parameter measurement. *J cell science*, **99** ( Pt 2),  
707 419–430.
- 708 26. Maiuri, P., Rupprecht, J.-F., Wieser, S., Ruprecht, V., Benichoe, O., Carpi, N., Coppey, M.,  
709 De Beco, S., Gov, N. *et al.* 2015 Actin flows mediate a universal coupling between cell speed and  
710 cell persistence. *Cell*, **161**, 374–386. doi:10.1016/j.cell.2015.01.056.
- 711 27. Gorelik, R. & Gautreau, A. 2015 The arp2/3 inhibitory protein arpin induces cell turning by  
712 pausing cell migration. *Cytoskeleton (Hoboken, N.J.)*, **72**, 362–371. doi:10.1002/cm.21233.

- 713 28. Miyoshi, H., Masaki, N. & Tsuchiya, Y. 2003 Characteristics of trajectory in the migration of  
714 Amoeba proteus. *Protoplasma*, **222**, 175–181. doi:10.1007/s00709-003-0013-7.
- 715 29. Zenkov, V. S., O'Connor, J., Cockburn, I. A. & Ganusov, V. V. 2022 A new method based on  
716 the von Mises-Fisher distribution shows that a minority of liver-localized CD8 T cells display  
717 hard-to-detect attraction to Plasmodium- infected hepatocytes. *Frontiers in Bioinformatics*, pp.  
718 1–15. doi:10.3389/fbinf.2021.770448.
- 719 30. Selmeczi, D., Mosler, S., Hagedorn, P. H., Larsen, N. B. & Flyvbjerg, H. 2005 Cell motility  
720 as persistent random motion: Theories from experiments. *Biophysical Journal*, **89**(2), 912–931.  
721 doi:<https://doi.org/10.1529/biophysj.105.061150>.
- 722 31. Gorelik, R. & Gautreau, A. 2014 Quantitative and unbiased analysis of directional persistence  
723 in cell migration. *Nature protocols*, **9**, 1931–1943. doi:10.1038/nprot.2014.131.
- 724 32. Wilkinson, P. C., Lackie, J. M., Forrester, J. V. & Dunn, G. A. 1984 Chemokinetic accumulation  
725 of human neutrophils on immune complex-coated substrata: analysis at a boundary. *J cell*  
726 *biology*, **99**, 1761–1768. doi:10.1083/jcb.99.5.1761.
- 727 33. Blanchoin, L., Boujemaa-Paterski, R., Sykes, C. & Plastino, J. 2014 Actin dynamics,  
728 architecture, and mechanics in cell motility. *Physiological reviews*, **94**, 235–263. doi:  
729 10.1152/physrev.00018.2013.
- 730 34. Shaebani, M. R., Jose, R., Santen, L., Stankevics, L. & Lautenschlager, F. 2020 Persistence-  
731 speed coupling enhances the search efficiency of migrating immune cells. *Physical review letters*,  
732 **125**, 268102. doi:10.1103/PhysRevLett.125.268102.
- 733 35. Kar, P., Tiruvadi-Krishnan, S., Mannik, J., Mannik, J. & Amir, A. 2021 Distinguishing different  
734 modes of growth using single-cell data. *eLife*, **10**. doi:10.7554/eLife.72565.
- 735 36. Purcell, E. M. 1977 Life at low Reynolds number. *American Journal of Physics*, **45**(1), 3–11.  
736 doi:10.1119/1.10903.
- 737 37. Hillen, T., Painter, K. J., Swan, A. C. & Murtha, A. D. 2017 Moments of von Mises and Fisher  
738 distributions and applications. *Mathematical biosciences and engineering*, **14**, 673–694. doi:  
739 10.3934/mbe.2017038.
- 740 38. Ulrich, G. 1984 Computer generation of distributions on the m-sphere. *Journal of the Royal*  
741 *Statistical Society. Series C (Applied Statistics)*, **33**(2), 158–163.
- 742 39. discontentment, J. M. 2020 Vectors with a certain magnitude in Mathematica. doi:  
743 [https://mathematica.stackexchange.com/questions/13038/vectors-with-a-certain-](https://mathematica.stackexchange.com/questions/13038/vectors-with-a-certain-magnitude-in-mathematica/13042)  
744 [magnitude-in-mathematica/13042](https://mathematica.stackexchange.com/questions/13038/vectors-with-a-certain-magnitude-in-mathematica/13042).
- 745 40. Dunn, G. A. & Brown, A. F. 1987 A unified approach to analysing cell motility. *J cell science.*  
746 *Supplement*, **8**, 81–102. doi:10.1242/jcs.1987.supplement\_8.5.
- 747 41. Ganusov, V. V., Zenkov, V. S. & Majumder, B. 2021 Simu-  
748 lating correlated random walks using von Mises-Fisher distribution.  
749 [https://github.com/vganusov/correlated\\_random\\_walk\\_simulations](https://github.com/vganusov/correlated_random_walk_simulations). b48132e.

750

# Correlation between speed and turning naturally arises for sparsely sampled cell movements

751

752

Vitaly V. Ganusov, Viktor S. Zenkov, and Barun Majumder

753

## **Supplemental Information**

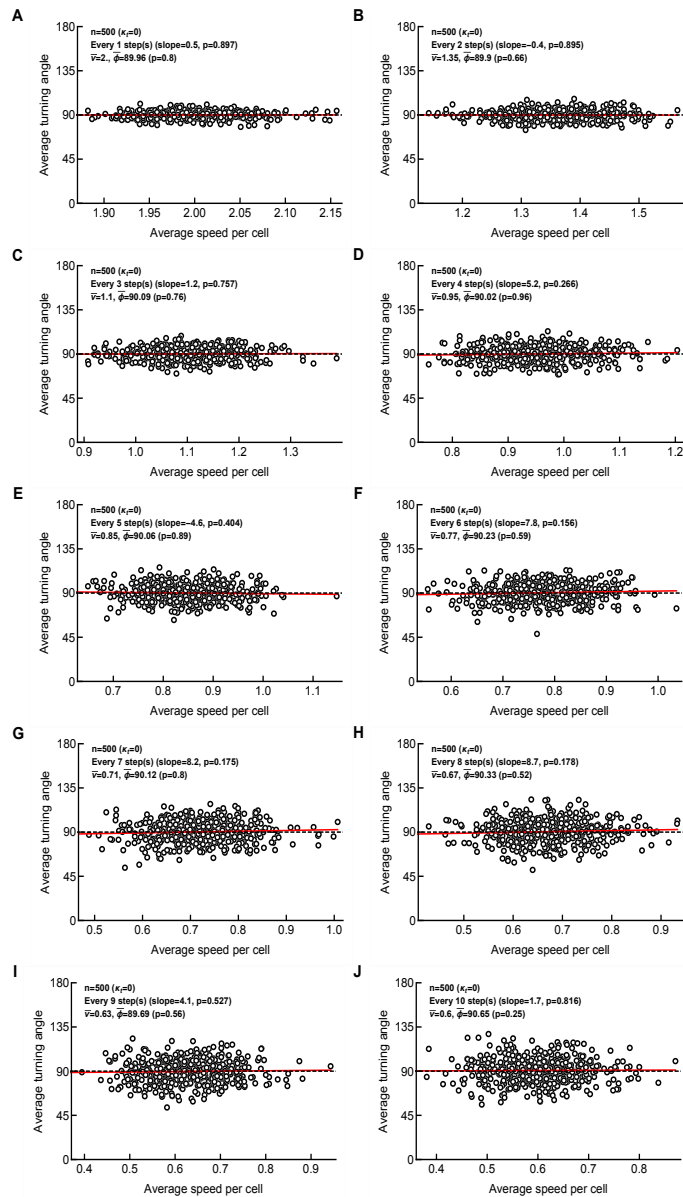

**Supplemental Figure S1:** A correlation between average turning angle and average speed does not arise for coarsely sampled data for uncorrelated random (Brownian) walk. Here all cells have the same concentration parameter  $\kappa_t \rightarrow 0$  (see eqn. (1)). We simulated movements of 500 cells for 100 steps and calculated the average speed and average turning angle per cell when sampling the data at different frequencies, starting with every step (panel A) and finishing with every 10 steps (panel J). Each panel contains information on the average speed for all cells ( $\bar{v}$ ), average turning angle for all cells ( $\bar{\phi}$ ), and the result of linear regression of the average speed per cell and average speed per cell (denoted as “slope”) with  $p$  value from the t-test. We also provide a test if the average turning angle of cells in the population is different from  $90^\circ$  (Mann-Whitney test).



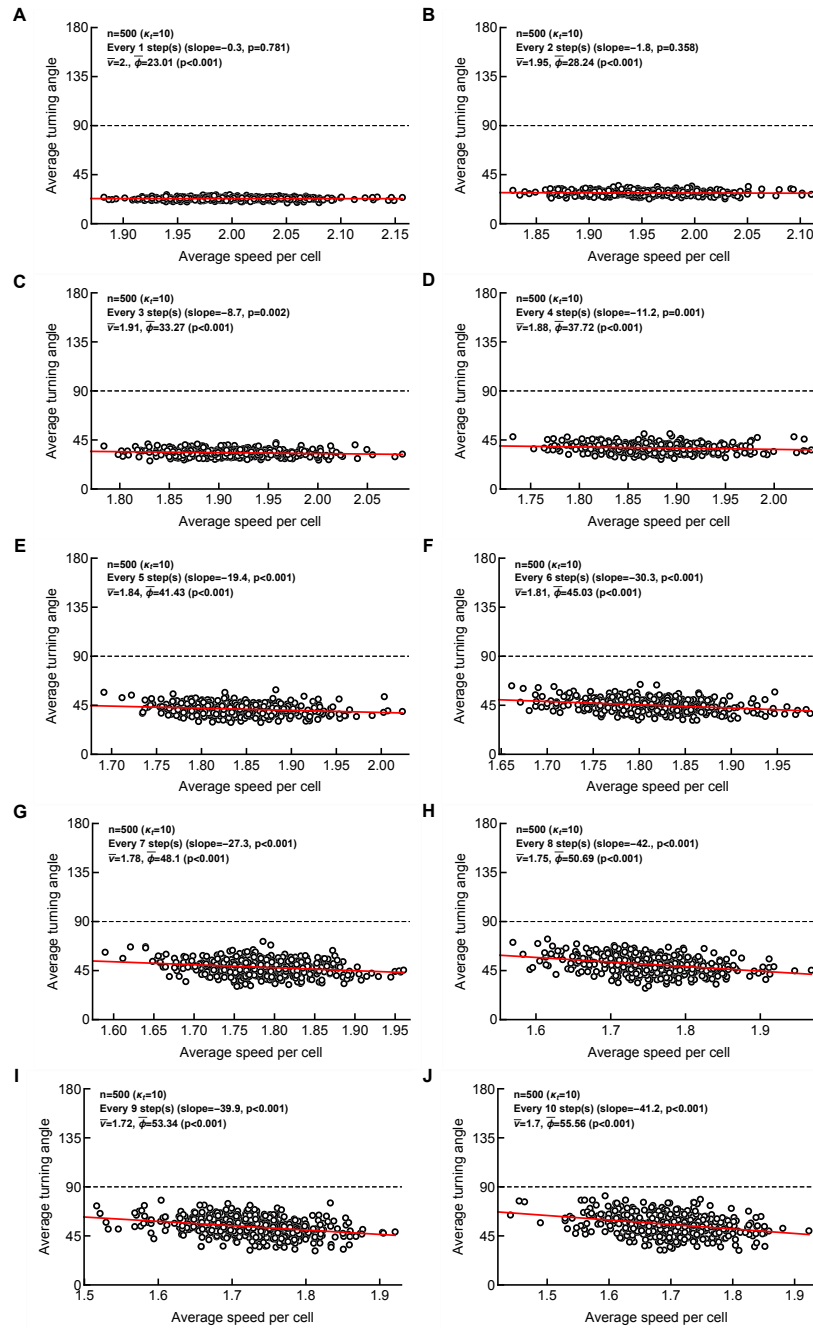

**Supplemental Figure S2:** A correlation between average turning angle and average speed appears for coarsely sampled data when cells undergo a correlated random walk. Here all cells have the same concentration parameter  $\kappa_t = 10$  - note different scale on  $x$  axis in different panels. See **Supplemental Figure S1** for other details.

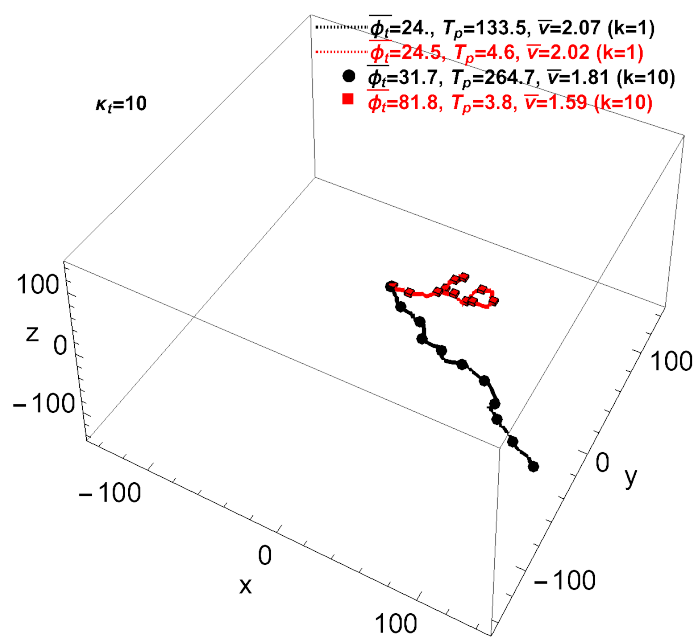

**Supplemental Figure S3:** Example of two simulated cells with different trajectories. From simulations in **Supplemental Figure S2** with a fixed  $\kappa_t = 10$  we sampled two cells with different behaviors. We estimated the average turning angle  $\bar{\phi}_t$ , persistence time  $T_p$  (from velocity correlations), and average speed ( $\bar{v}$ ) for the data sampled every step ( $k = 1$ , given by lines) or every 10th step ( $k = 10$ , given by markers).

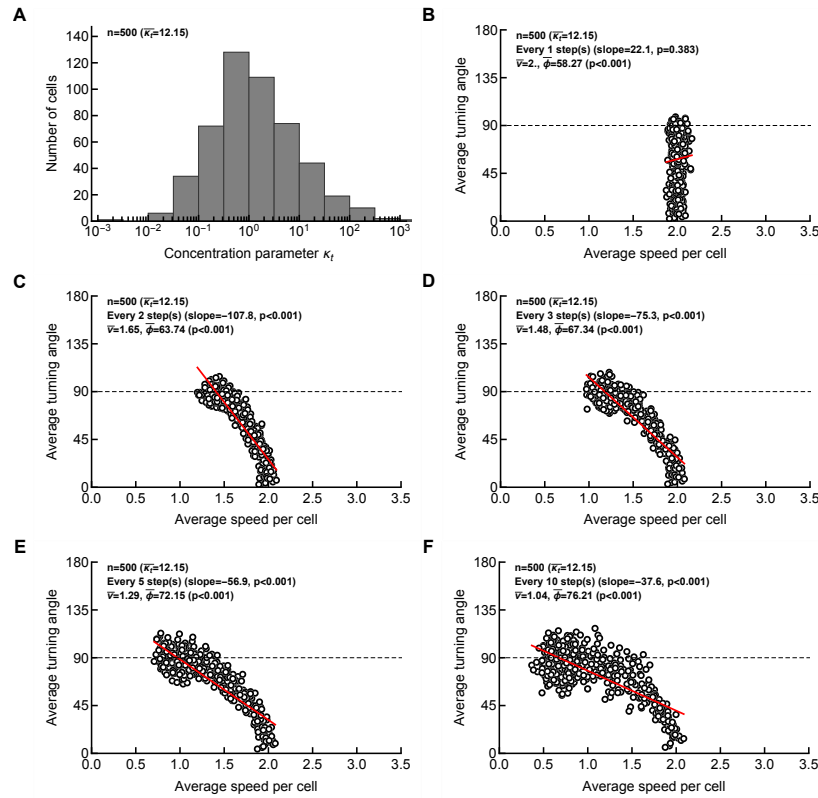

**Supplemental Figure S4:** A strong negative correlation between average turning angle and average speed naturally arises for heterogeneous cell populations with coarsely sampled data. We assume that every cell in the population has a different  $\kappa_t$  (from vMF distribution, see eqn. (1)) which was drawn from a lognormal distribution (eqn. (4) with  $\mu = 1$  and  $\sigma = 2$ , shown in panel A), and the movement data were sampled at different frequency ( $k = 1, 2, 3, 5, 10$  for panels B-F, respectively). The average concentration parameter  $\bar{\kappa}_t$  is shown on other panels B-F. See **Supplemental Figure S1** for other details.

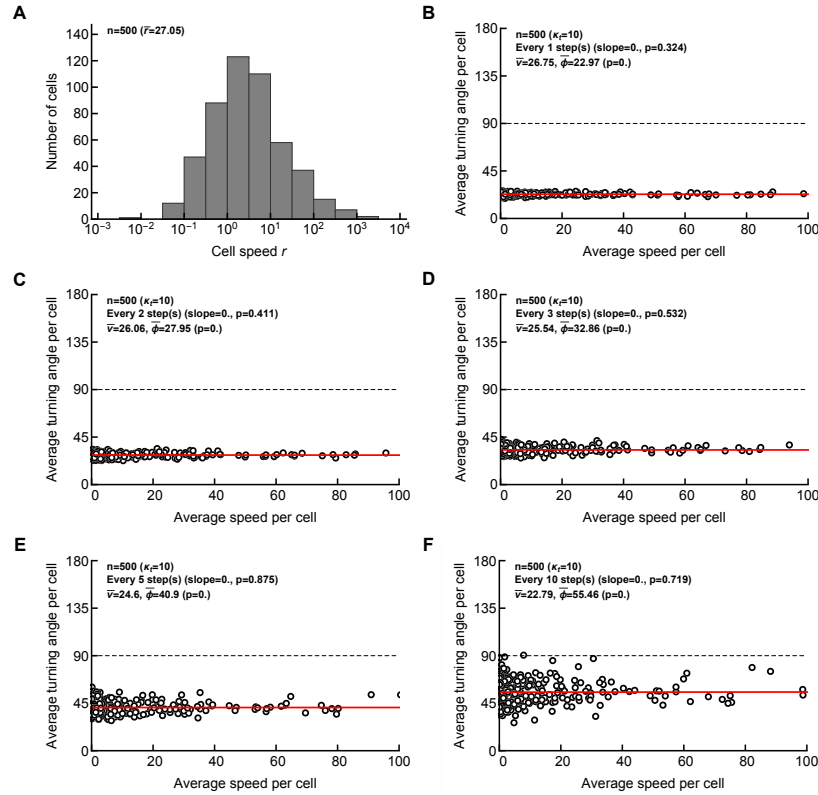

**Supplemental Figure S5:** Variability in intrinsic movement speed does not result in a significant correlation between average turning angle and average speed. Here we assume that every cell in the population has a different  $\bar{r}$  which was drawn from a lognormal distribution (eqn. (4) with  $\mu = 1$  and  $\sigma = 2$ , shown in panel A), and the movement data were sampled at different frequency ( $k = 1, 2, 3, 5, 10$  for panels B-F, respectively). Turning angles are defined with  $\kappa_t = 10$  in vMF distribution (eqn. (1)). See **Supplemental Figure S1** for other details.

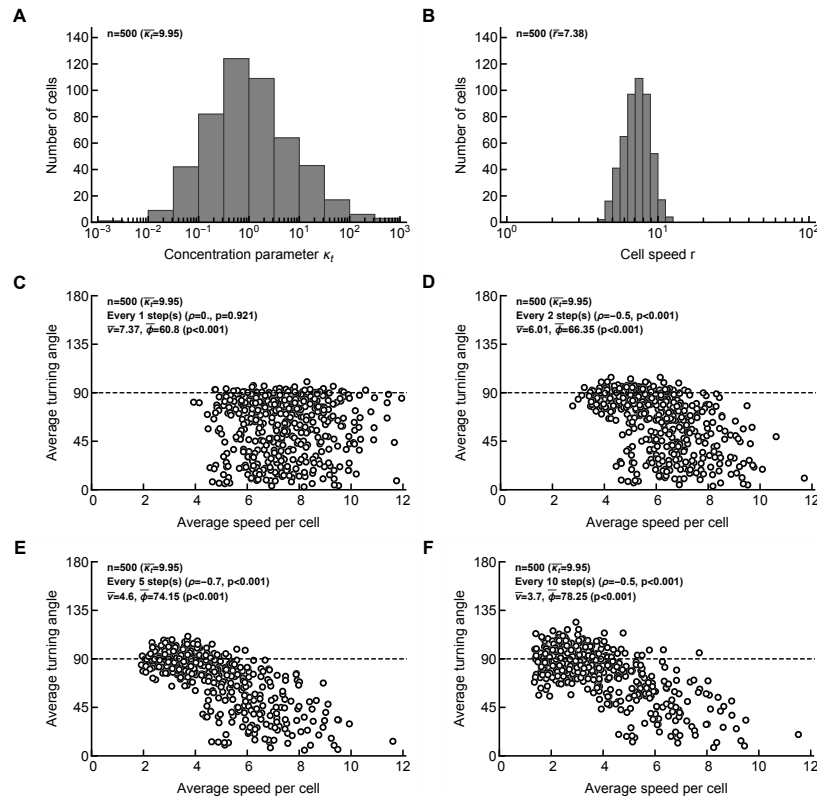

**Supplemental Figure S6:** A strong negative correlation between average turning angle and average speed naturally arises when both persistence and cell speeds are variable (but uncorrelated) for different cells for coarsely sampled data. Here we assume that every cell in the population has a different  $\kappa_t$  which was drawn from a lognormal distribution (eqn. (4) with  $\mu = 0$  and  $\sigma = 2$ , panel A), and every cell has a random speed determined by  $\bar{r}$  in the Pareto distribution ( $\bar{r}$  was drawn from a lognormal distribution with  $\mu = 2$  and  $\sigma = 0.2$ , panel B), and the movement data were sampled at different frequency ( $k = 1, 2, 5, 10$  for panels C-F, respectively). Correlation was accessed using Spearman rank test with  $\rho$  and  $p$  values indicated on individual panels (because Pearson correlation was not appropriate in this case due to non-normality of the data). See **Supplemental Figure S1** for other details.

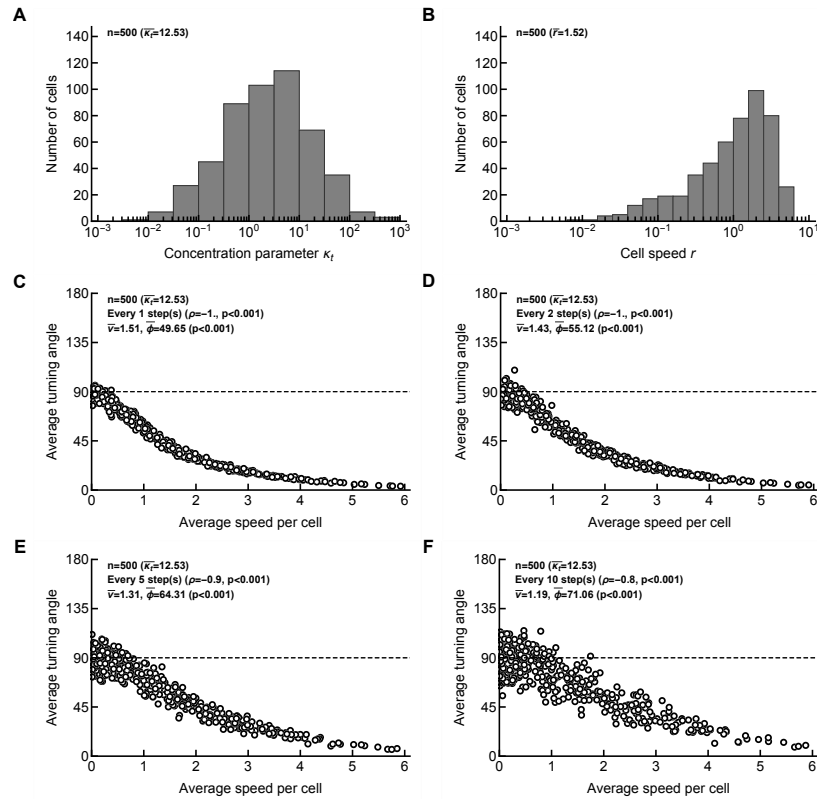

**Supplemental Figure S7:** Intrinsic correlation between instantaneous cell speed and turning angles is relatively insensitive to sampling frequency. Here we assume that every cell in the population has a different  $\kappa_t$  which was drawn from a lognormal distribution (eqn. (4) with  $\mu = 1$  and  $\sigma = 2$ , panel A), and every cell has a speed determined by  $\kappa_t$  (i.e., assuming a relationship for each cell as  $\bar{r} = \ln(1 + \kappa_t)$  for the Pareto distribution (eqn. (3)), panel B), and the movement data were sampled at different frequency ( $k = 1, 2, 5, 10$  for panels C-F, respectively). Correlation was accessed using Spearman rank test with  $\rho$  and p values indicated on individual panels. See **Supplemental Figure S1** for other details.



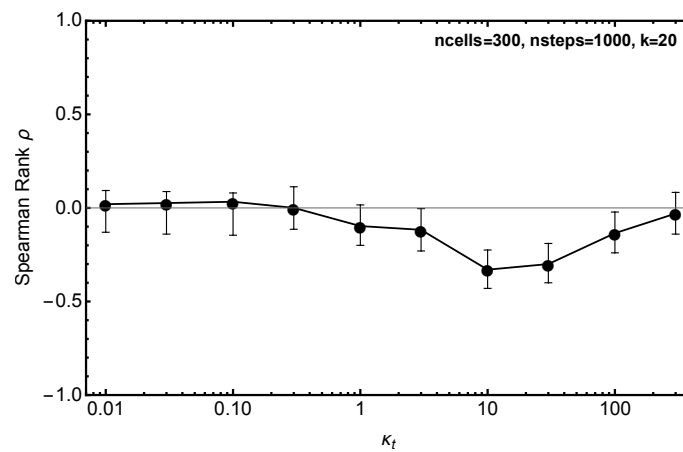

**Supplemental Figure S8:** Negative correlation between speed and turning angle arises for a relatively large range of movement persistence (defined as  $\kappa_t$  in vMF distribution-based simulations). We simulated movement of 300 cells for 1000 steps using vMF distribution assuming the same  $\kappa_t$  and speed ( $\bar{r} = 2$ ) for every cell. We sub-sampled the cell trajectories with  $k = 20$ . Confidence intervals (95%) for the estimated Spearman rank correlation coefficient  $\rho$  were calculated using bootstrap approach in routine `SpearmanRho` in R package `DescTools`.

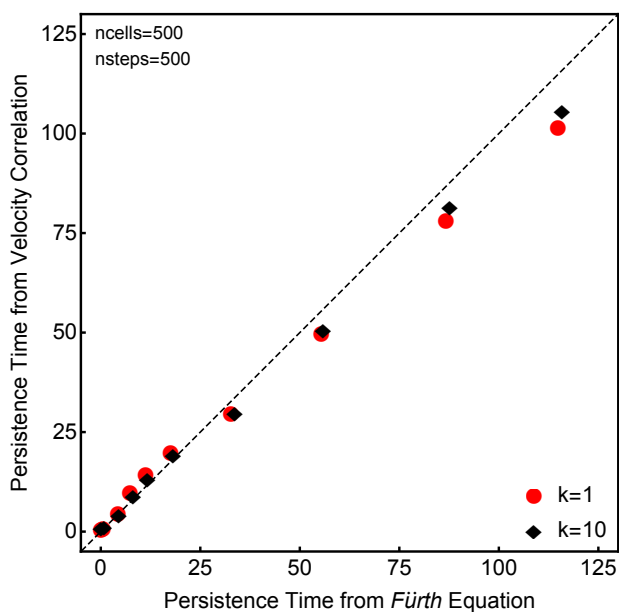

**Supplemental Figure S9:** Using FÜRTH equation to MSD data and fitting an exponential decay function to velocity correlations result in similar persistence times in simulations. We simulated sets of 500 cells each with 500 movements with fixed  $\bar{r} = 2.0$  displacement per movement, varied the concentration parameter  $\kappa_t$  in the range 0.1 – 100 for each simulation, and sampled the resulting simulation data every movement ( $k = 1$ ) or sub-sampled every  $k = 10^{\text{th}}$  movement. We estimated persistence time for the whole cell population by fitting the FÜRTH equation (eqn. (7)) to the population average MSD data or by fitting an exponential equation (eqn. (8)) to the velocity correlation curve of all cells (see Materials and Methods for more detail).

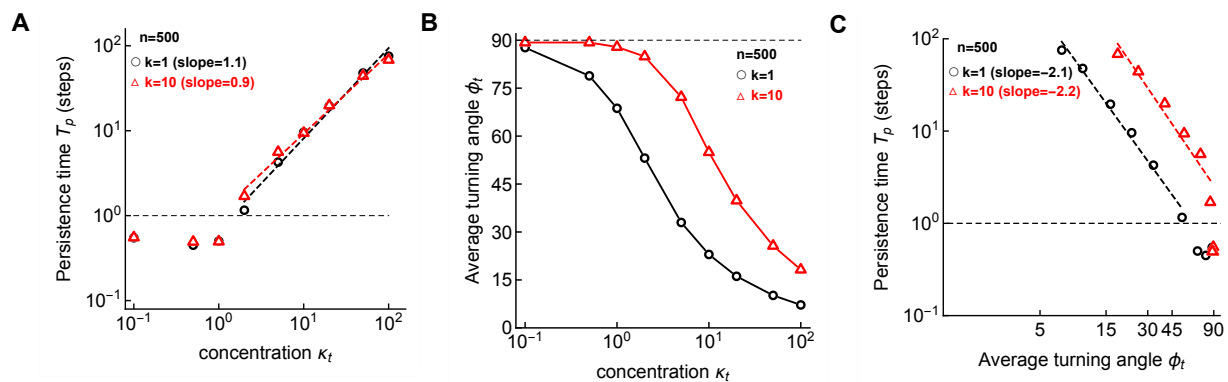

**Supplemental Figure S10:** Negative correlation between estimated persistence time and average turning angle. We simulated 9 sets of 500 cell movements each with 100 steps. For the simulated sets we fixed  $\bar{r} = 2.0$  but varied the concentration parameter  $\kappa_t$  of the vMF distribution in the range 0.1 – 100. For sampling the data at every step ( $k = 1$ ) or every  $k = 10^{\text{th}}$  step we then estimated the persistence time ( $T_p$ ) by fitting the Fürth equation (eqn. (7)) to the MSD curves calculated using population average (see Materials and Methods for the estimation of persistence time). We also computed the average tuning angles ( $\phi_t$ ) for each set of simulations. In panel A we show the variation of estimated persistence time with concentration parameter  $\kappa_t$ , in panel B we show the variation of average turning angle with concentration parameter  $\kappa_t$ , and in panel C we show the variation of estimated persistence time with average turning angle. Dashed horizontal line denotes the limit of detection of the persistence time and the data below detection limit were excluded from the regression analysis (shown by the dashed lines).

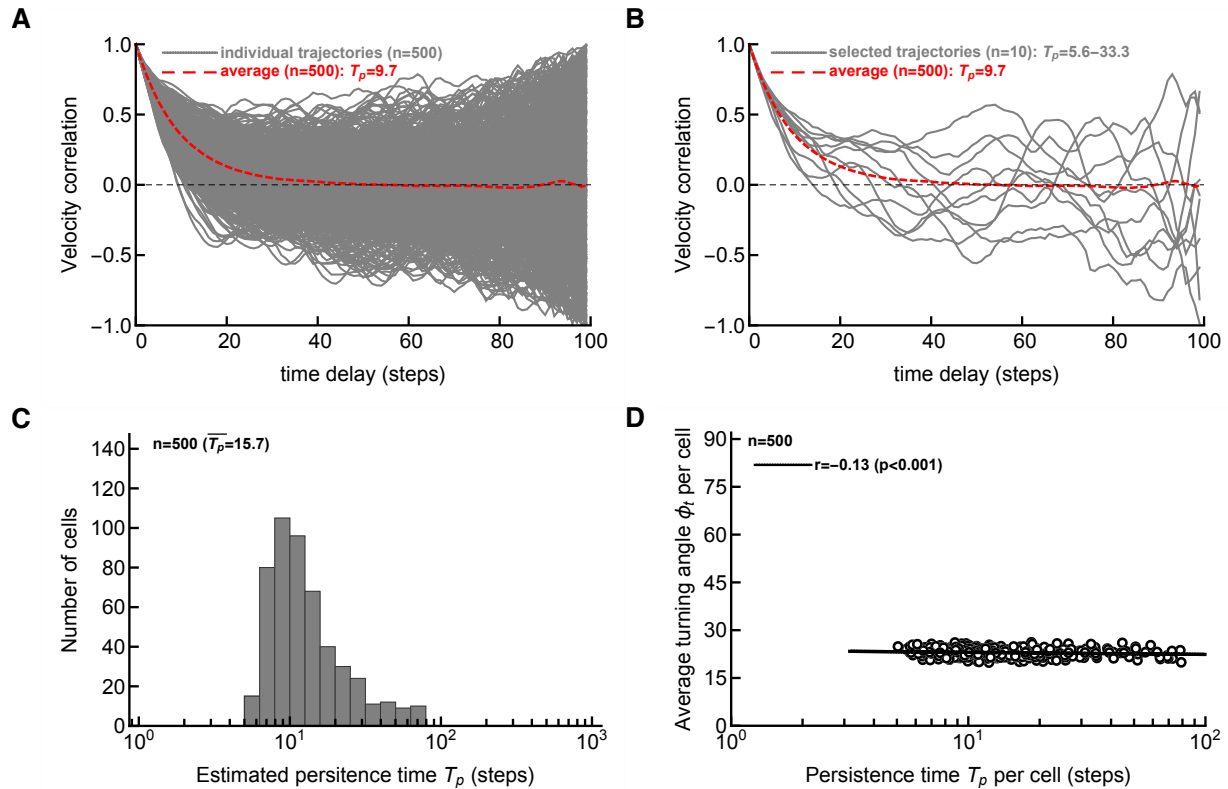

**Supplemental Figure S11:** Variability in estimated persistence time for individual cells using velocity correlation. We simulated 500 cells with 100 steps with  $\kappa_t = 10$  and  $\bar{r} = 2$  and calculated the velocity correlation curves for data sampled every movement ( $k = 1$ ). By fitting an exponential decay equation (eqn. (8)) to the trajectory data for individual cells we estimated the persistence time  $T_p$  for each cell. The red line is the average  $\cos \phi$  for all the tracks. In panel B we randomly selected 10 tracks and indicate estimated  $T_p$  for these tracks. In panel C we show the distribution of persistence times  $T_p$  for all trajectories. In panel D we show statistically significant but weak correlation between average turning angle and persistence time per cell. Note that in these simulations all cells have identical assumed persistence (defined by  $\kappa_t$ ).

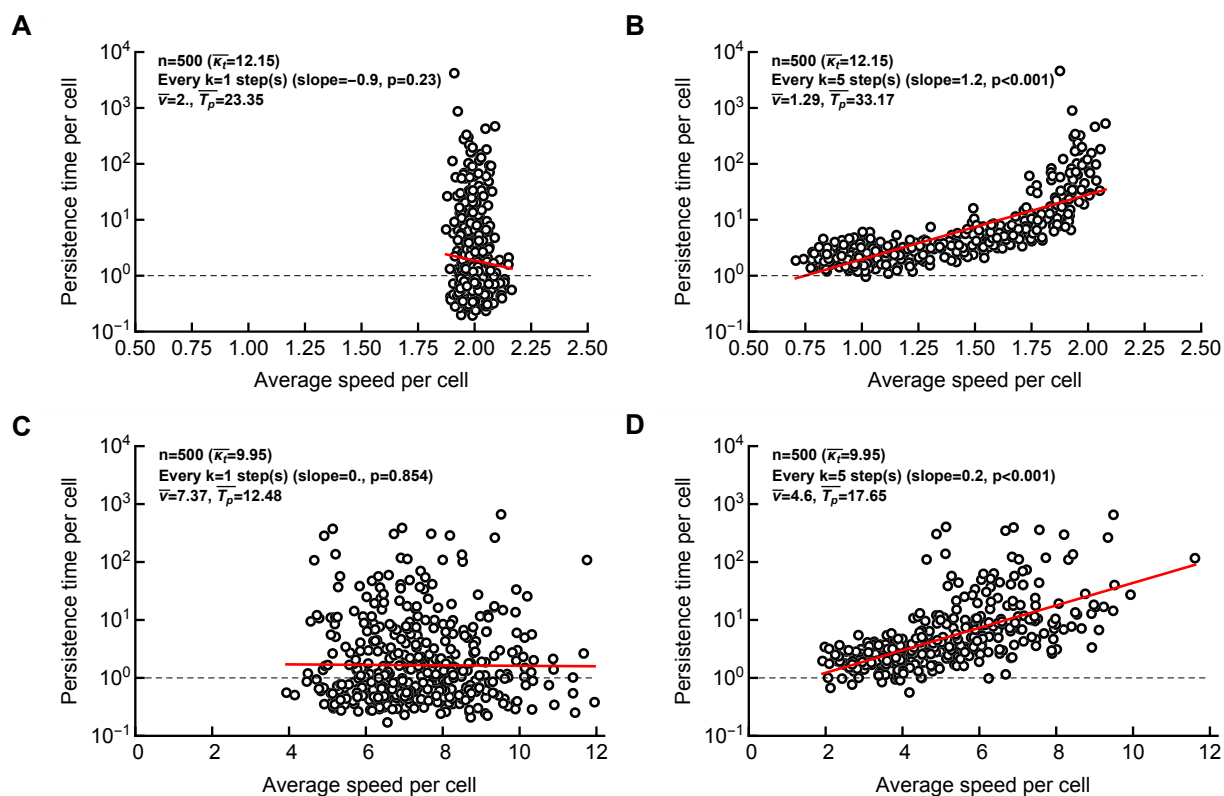

**Supplemental Figure S12:** Correlation between persistence time per cell and average speed per cell arises due to sub-sampling. We simulated movements of cells as described in **Figure 2E-F** with  $\kappa_t$  chosen from a lognormal distribution and  $\bar{r} = 2$  was fixed (A-B) or when  $\bar{r}$  was also chosen from lognormal distribution (C-D); parameters were the same as in **Figure 2E-F**. For each cell we estimated the average speed per cell and the persistence time by fitting eqn. (8) to the velocity correlation curve (see Materials and Methods for more details). In panels A&C sampling is done of every step ( $k = 1$ ) and in panels B&D sampling is done at every  $k = 5^{\text{th}}$  step. Of note, at  $k = 10$ , correlation between persistence time and speed remained statistically significant, however, we estimated low ( $< 1$  step) persistence time for a small fraction of cells which is unrealistic.

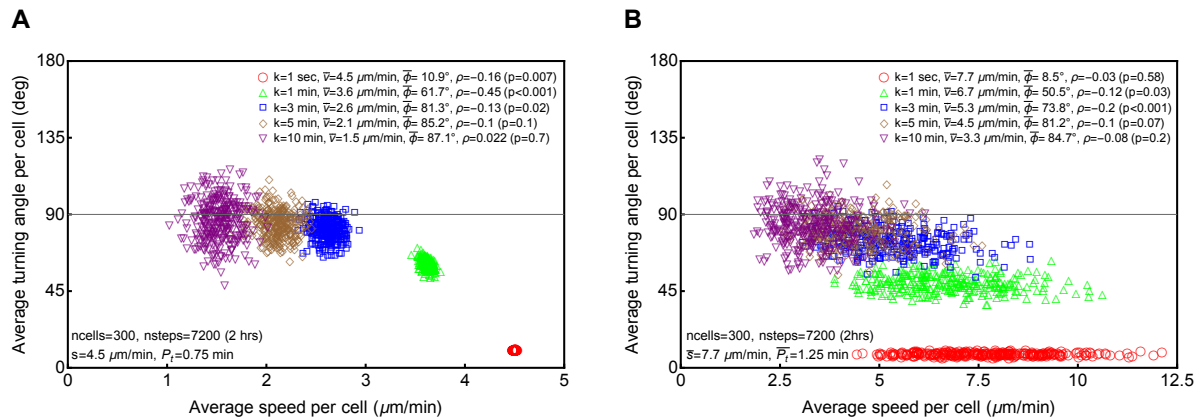

**Supplemental Figure S13:** In PRWs simulated as a OU process correlation between speed and turning angle vanishes when sampling interval is much larger than the typical persistence time. We simulate the persistent random walk using a model based on OU framework and described by Wu *et al.* [16]. In panel A we assume that every cell have the same persistence time  $T_P = P = 0.75$  min and same speed  $s = 4.5$   $\mu\text{m}/\text{min}$ . We simulated 7200 steps equivalent to 2 hours for 300 cells and sampled for every  $k^{\text{th}}$  min as shown in the legends (1, 10, 50, 100, 200). In panel B we assume that every cell in the population has different persistence times which was drawn from a lognormal distribution (eqn. (4) with  $\mu = 0.2$  and  $\sigma = 0.2$ ), and every cell has a random speed drawn from a lognormal distribution with  $\mu = 2$  and  $\sigma = 0.2$ . We simulated 7200 steps equivalent to 2 hours for 300 cells and sampled for every  $k^{\text{th}}$  min as shown in the legends. For every set of simulations we also show the average speed ( $\bar{v}$ ), average turning angle ( $\bar{\phi}$ ) per population, and Spearman rank correlation coefficient ( $\rho$ ) and p value from the test (that  $\rho = 0$ ).



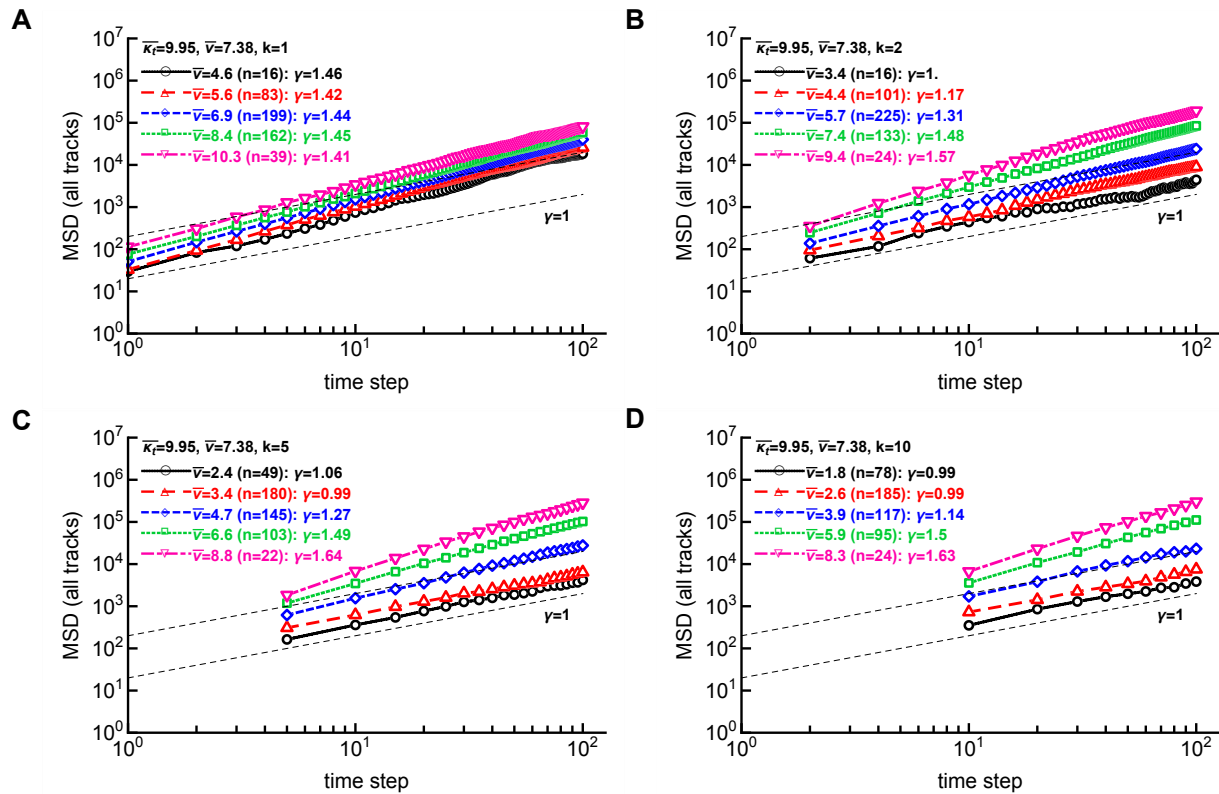

**Supplemental Figure S14:** Coarse sampling results in different mean square displacements of cell cohorts with similar inferred average speeds. Here we assume that every cell in the population has a different  $\kappa_t$  which was drawn from a lognormal distribution (eqn. (4) with  $\mu = 0$  and  $\sigma = 2$ ), and every cell has a random speed determined by  $\bar{v}$  in the Pareto distribution ( $\bar{v}$  was drawn from a lognormal distribution with  $\mu = 2$  and  $\sigma = 0.2$ ). This was identical to how simulations were done in **Figure S6**. We binned the resulting cell trajectories by calculating average speed per track (given specific sampling frequency given by  $k$ , shown in individual panels) and binned tracks into cohorts with different average speeds. Binning was done by log-transforming the average speeds and then selecting tracks using equally spaced boundaries with 5 bins between minimal and maximal average speeds recorded per sampling simulation. The resulting number of cell trajectories per bin is denoted by  $n$  in individual panels, together with the average speed of cells in a bin ( $\bar{v}$ ), and the slope  $\gamma$  at which log MSD is changing with log time. Simulations were done with 500 cells for 100 timesteps. Thin dashed lines have a slope  $\gamma = 1$ .

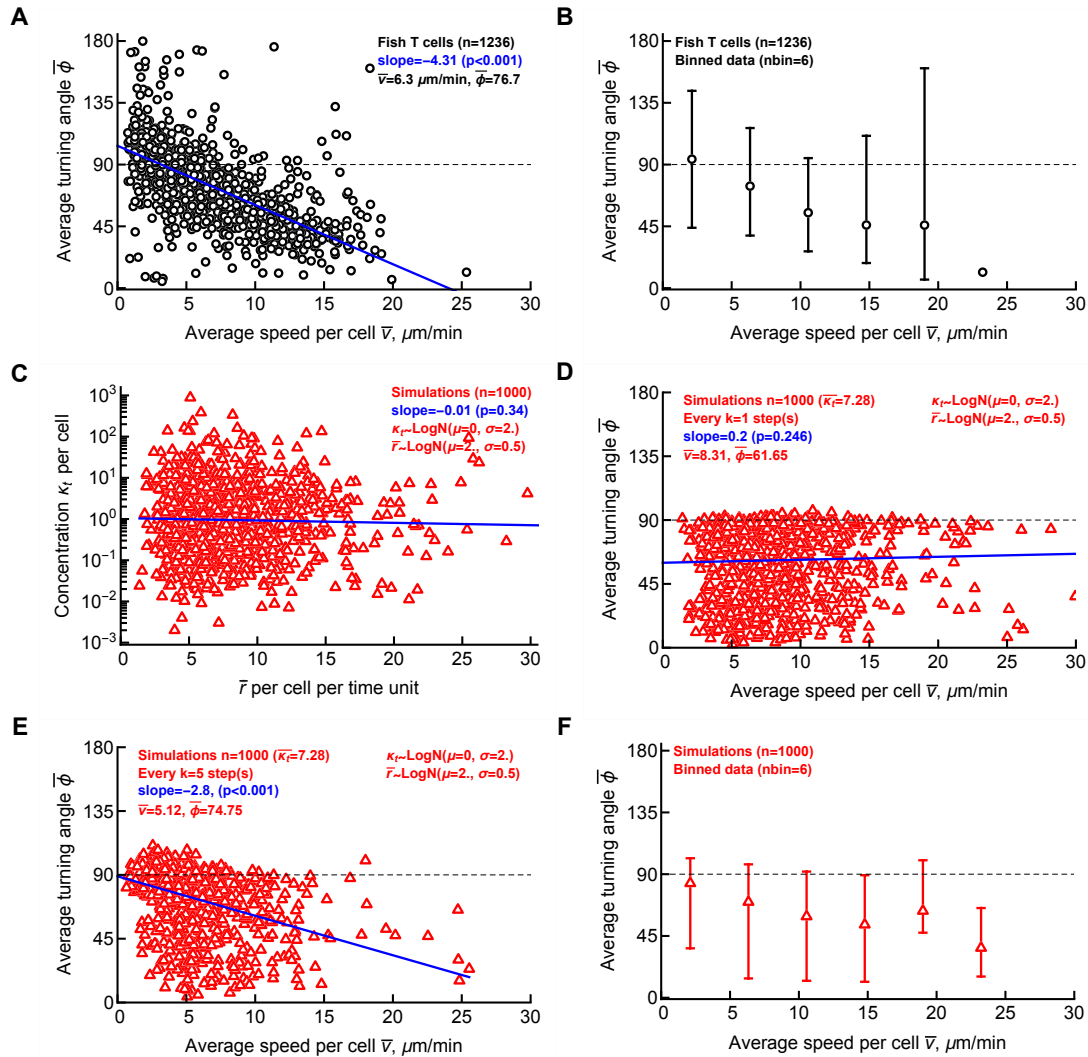

**Supplemental Figure S15:** Simulations of cell movement are consistent with experimental data when in simulations cell's speed and turning ability are uncorrelated but when trajectories are sub-sampled. We cleaned the original data for movement of T cells in zebrafish [18] by splitting cell tracks that had missing coordinates so that every coordinate measurements occurred in equally spaced intervals (45 sec, see Materials and Methods for more detail). For  $n = 712$  original cell tracks this resulted in 1236 tracks. For every trajectory we calculated the average speed and average turning angle (A) or binned the data into 6 cohorts with following bin boundaries (0., 4.22, 8.45, 12.67, 16.90, 21.12, 25.34)  $\mu\text{m}/\text{min}$  (B). We then performed stochastic simulations of 1000 cells for 100 time units with each cell having a defined persistence ability (defined by  $\kappa_t$ ) and speed defined by  $\bar{r}$ , each drawn from a lognormal distribution (eqn. (4)) with parameters  $\mu = 0$ ,  $\sigma = 2$  for  $\kappa_t$  and  $\mu = 2$ ,  $\sigma = 0.5$  for  $\bar{r}$ , respectively (C). For every track we then calculated the average speed and average turning angle when the data were sampled every time step ( $k = 1$ , D) or every  $k = 5$  steps (E) assuming that sampling in both cases occurs with frequency of 1min. For the simulations data in E we also binned the data the same way as for experimental data (F). Confidence intervals in B and F denote 2.5 and 97.5 percentiles of the data. Other characteristics shown on individual panels are for average speed  $\bar{v}$ , average turning angle  $\bar{\phi}$ . P values for the regression slopes (denoted by solid blue lines) were calculated using linear regression. Another set of parameters for which we found a good match between simulations and data are for  $\kappa_t$  with  $\mu = 0$  and  $\sigma = 2$  and for  $\bar{r}$  with  $\mu = 2.7$  and  $\sigma = 0.2$  sampled at  $k = 5$  (results not shown).

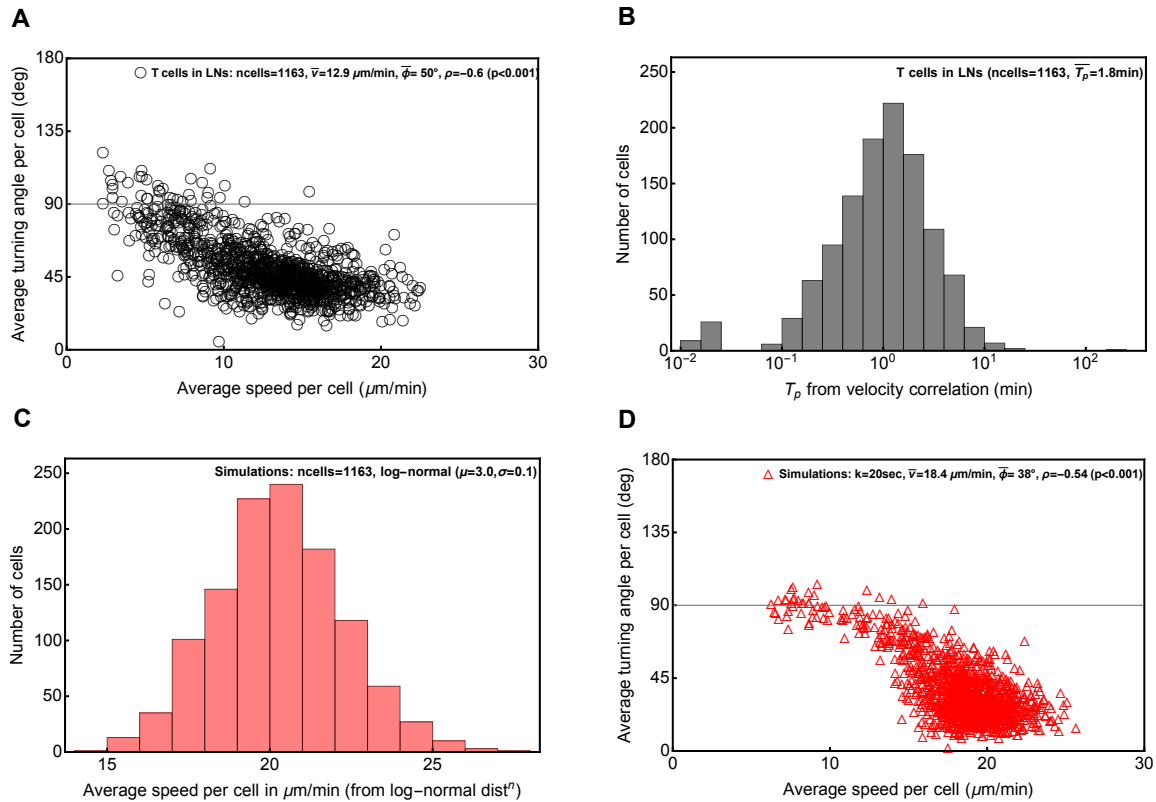

**Supplemental Figure S16:** Sub-sampling of simulated cell movements can match experimental data on T cell movement in murine lymph nodes (LNs). For each trajectory in the experimental data on movement of naive CD8 T cells in LNs [11, 14] we calculated the average speed and average turning angle (panel A) or the persistence time from velocity correlations (panel B). We then simulated movement of cells using Wu *et al.* [16] method by taking specific values of persistence time  $T_p$  for each cell in panel B and randomly assigning the speed of each cells from a lognormal distribution (panel C,  $\mu = 3$ ,  $\sigma = 0.1$ ). Cell movements were simulated every second and we sampled the resulting trajectories every  $k = 20$  sec (panel D). The correlations observed experimentally or in simulations were evaluated using Spearman rank test (A&D) with p values from the test  $\rho = 0$  being indicated on individual panels.
